# Fine tuning of Piezo1 Expression and Activity Ensures Efficient Myoblast Fusion during Skeletal Myogenesis

Huascar Pedro Ortuste Quiroga<sup>1\*</sup>, Massimo Ganassi<sup>3</sup>, Shingo Yokoyama<sup>2</sup>, Kodai Nakamura<sup>1</sup>, Tomohiro Yamashita<sup>1</sup>, Daniel Raimbach<sup>4</sup>, Arisa Hagiwara<sup>1</sup>, Oscar Harrington<sup>4</sup>, Jodie Breach-Teji<sup>4</sup>, Atsushi Asakura<sup>5</sup>, Yoshiro Suzuki<sup>6</sup>, Makoto Tominaga<sup>6</sup>, Peter S. Zammit<sup>3</sup>, Katsumasa Goto<sup>1,2,\*</sup>

<sup>1</sup> Department of Physiology, Graduate School of Health Sciences, Toyohashi SOZO University

<sup>2</sup> Laboratory of Physiology, School of Health Sciences, Toyohashi SOZO University

<sup>3</sup> Randall Centre for Cell and Molecular Biophysics, King's College London, London, SE1 1UL, UK

<sup>4</sup> Centre of Human and Aerospace Physiological Sciences, King's College London, London, SE1 1UL, UK

<sup>5</sup> Stem Cell Institute, Paul & Sheila Wellstone Muscular Dystrophy Center, Department of Neurology, University of Minnesota Medical School

<sup>6</sup> Division of Cell Signalling, National Institute for Physiological Sciences

\* Correspondence: [gotok@sepia.ocn.ne.jp](mailto:gotok@sepia.ocn.ne.jp), [s1855105@sc.sozo.ac.jp](mailto:s1855105@sc.sozo.ac.jp)

**Abstract:** Mechanical stimuli such as stretch and resistance training are essential to regulate growth and function of skeletal muscle. However, the molecular mechanisms involved in sensing mechanical stress during muscle formation remain unclear. Here, we investigate the role of the mechanosensitive ion channel Piezo1 during myogenic progression. Direct manipulation of Piezo1 in muscle stem cells alters their myogenic progression. Indeed, *Piezo1* knockdown suppresses myoblast fusion leading to smaller myotubes. Such event is accompanied by significant downregulation of the fusogenic protein *Myomaker*. In parallel, while *Piezo1* knockdown also lowers Ca<sup>2+</sup> influx in response to stretch, Piezo1 activation increases Ca<sup>2+</sup> influx in response to stretch and enhances myoblasts fusion. We believe these findings may help understand molecular defects present in some muscle diseases. Altogether our study shows that Piezo1 is essential for terminal muscle differentiation acting on myoblast fusion, suggesting that Piezo1 deregulation may have implications in muscle aging and degenerative diseases including muscular dystrophies.

**Key words:** skeletal muscle, satellite cells, mechanosensation, Piezo1, Ca<sup>2+</sup> channel, myocyte fusion

## 1. Introduction

Skeletal muscle is a highly specialised tissue composed of multi-nucleated, post-mitotic myofibres. Since myonuclei within a myofibre do not divide after development, the production of new myonuclei, to sustain muscle maturation and repair, is entrusted to muscle stem cells (named satellite cells (SCs)). SCs are found on the surface/periphery of postnatal skeletal myofibres [1-3] and in response to muscle damage or hypertrophic stimuli, rapidly activate to generate a myoblast progeny that proliferate, undergo myogenic differentiation, and finally fuse to repair damaged myofibres, resulting in regeneration of a functional muscle [4]. Therefore, alterations in the myoblast fusion machinery can have profound effects on regeneration efficiency. An important process dictating myoblast fusion is mechanosensation, but how this is regulated in muscle remains largely unknown.

Mechanosensitive (MS) ion channels are pore-forming membrane proteins which gate in response to mechanical stimuli applied on the cell membrane [5-7]. MS ion channels have been linked to many physiological processes associated with mechanosensory transduction; including osmoregulation, proprioception, hearing, touch, blood flow regulation to name but a few examples [8-10]. Piezo1 and Piezo2 were first identified as the long-sought principal types of molecular force sensors (mechanosensors) in mammalian

cells [5]. Piezo1, and similarly Piezo2, are very large proteins containing ~2500 amino acids with each subunit (three subunits per channel) having an estimated 24-40 transmembrane (TM) segments [6, 8, 11, 12]. Characterisation of ionic selectivity revealed that Piezo1 was nonselective, permeating Na<sup>+</sup>, K<sup>+</sup>, Ca<sup>2+</sup> and Mg<sup>2+</sup> with a preference for Ca<sup>2+</sup> [5, 13]. Ca<sup>2+</sup> regulation plays a crucial role in skeletal muscle maintenance and repair, thus understanding Piezo1's function may prove vital when developing therapeutic interventions for muscular dystrophies [14, 15].

Here, we analyse the role of Piezo1 in skeletal myogenesis, focussing on muscle differentiation and its role in stretch-induced Ca<sup>2+</sup> influx of primary myoblast-derived myotubes. Our findings reveal that *Piezo1* is dispensable for myoblast proliferation and onset of differentiation, but is finely regulated during myoblast fusion and myofibre maturation. Indeed, *Piezo1* knockdown suppresses myotube formation and maturation in primary myotubes derived from mouse slow soleus (SOL) and fast extensor digitorum longus (EDL) muscles. At the molecular level, *Piezo1* reduction leads to downregulation of the fusogenic gene *Myomaker*, decreases filamentous actin (f-actin) accumulation and organisation and lowers Ca<sup>2+</sup> influx of myotubes in response to mechanical stretch. In contrast, administration of the Piezo1-specific agonist Yoda1 increased myoblast fusion. Congruently, Piezo1 activation also showed increased Ca<sup>2+</sup> influx in response to stretch. In summary, we show that Piezo1 plays a crucial role at the terminal stage of myoblast myocyte fusion and myofibre maturation.

## 2. Materials and Methods

### *Primary myoblast cell culture*

All experimental procedures were carried out in accordance with the Guide for the Care and Use of Laboratory Animals as adopted and promulgated by the National Institutes of Health (Bethesda, MD, USA) and were approved by the Animal Use Committee of Toyohashi SOZO University A2018006, A2019006). Male C57BL/6J mice (8-12 weeks of age) were used. All mice were housed in a vivarium room with 12-h-12-h light-dark cycle; with temperature and humidity maintained at ~23°C and ~50%, respectively. Solid food and water were provided *ad libitum*.

After cervical dislocation, the EDL (*extensor digitorum longus*) and SOL muscles were carefully dissected, and manipulated only by their tendons. Muscles were digested in 0.2% Collagenase Type 1 (Sigma, UK. Ref: SCR103) in Dulbecco's Modified Eagle Medium (DMEM, Gibco, Thermo Fisher Scientific, Ref: 11885084) with 1% penicillin/streptomycin (Pen Strep, Gibco, Thermo Fisher Scientific, Ref: 15140-122) for 2 hours. Individual myofibres were then dissociated by trituration using heat polished glass Pasteur pipettes (Marienfeld, Germany. Ref: 3233049) with variously sized apertures (coated with 5% BSA, Sigma-Aldrich, Ref: A7906-100G) and washed as described by Collins and Zammit (2009)[16]. Isolated myofibres were plated on Matrigel (Corning. Ref: 354234) and the SC-derived myoblasts were then expanded in proliferation medium, consisting of; DMEM, with 30% heat-inactivated foetal bovine serum (FBS) (Gibco, Thermo Fisher Scientific. Ref: 26140-079), 10% horse serum (Gibco, Thermo Fisher Scientific, Ref: 16050-122), 1% chick embryo extract (Sera Laboratories. Ref: CE-650-TL), 10 ng/ml basic FGF (bFGF, Gibco, Thermo Fisher Scientific. Ref: PHG0264) and 1% penicillin. Cells were kept in a 37°C incubator (Panasonic, MCO-230AICUVH) under a humidified atmosphere with 95% air and 5% CO<sub>2</sub>. Cells designated for proliferation and differentiation conditions were seeded at different densities depending on the size of wells they were cultured in. For 96-well plate proliferation conditions required 5,000 cells per well, and for differentiation, cells were seeded at 10,000 cells per well. For 6-well plates, proliferating and differentiation cohorts consisted of 50,000 cells and 70-80,000 per well, respectively. Differentiation medium was made up of DMEM, 2% heat-inactivated horse serum, and 1% penicillin.

### *siRNA transfection*

Small interfering RNAs (siRNAs) were purchased from (Qiagen, Hiden, Germany) (Table 1) and diluted to 20 or 10  $\mu\text{M}$  in double-distilled water (ddH<sub>2</sub>O) and stored at -20°C. To investigate the effects *Piezo1* knockdown on proliferation, early entry into differentiation and myotube formation, *Piezo1*-targeting or control scrambled siRNA (siScrambled; Qiagen, Hiden, Germany) was transfected in proliferation medium. Cells were plated on 6-well plates at 50,000 cells per well in proliferation medium. Following a 24 h incubation period, the medium was replaced with 1.75 ml fresh proliferation medium and the transfection mixture was prepared: A solution 150  $\mu\text{l}$  Optimem (Gibco, Thermo Fisher Scientific. Ref: 31985-070) medium with 9  $\mu\text{l}$  of lipofectamine (lipofectamine RNAiMAX Thermo Fisher Scientific. Ref: 13778030) was made for each well. Separately, siRNA was diluted in 150  $\mu\text{l}$  Optimem. The two solutions were then mixed and incubated for 5 min. 250  $\mu\text{l}$  of the siRNA/lipofectamine mixture was added to corresponding wells dropwise. The final siRNA concentration was set at 10 nM. Following overnight incubation in the transfection medium, cells were trypsinised for RT-qPCR analysis and seeded in 96-well plates for proliferation and differentiation cohorts (day 1 and day 3 differentiation) in proliferation and differentiation medium, respectively. After a 24-hour incubation, proliferating cells were subjected to a 2-hour 5-ethynyl-2'-deoxyuridine (EdU) pulse and fixed as below. Day 1 and day 3 differentiating cohorts were also fixed.

To determine *Piezo1*'s role in myotube formation, siRNA transfection was performed in early differentiated myotubes. Cells were seeded at confluency in differentiation medium. Following 24-hour incubation in differentiation medium, siRNA transfection was performed. Cohorts were designated for RT-qPCR analyses and immunolabelling.

**Table 1. List of siRNAs used**

| Gene                                                                    | Species | siRNA ID                  |
|-------------------------------------------------------------------------|---------|---------------------------|
| <i>scrambled non-targeting siRNA</i> (All Stars Negative Control siRNA) | Mouse   | Qiagen, 1027281           |
| <i>Piezo1</i>                                                           | Mouse   | <b>Qiagen, S104420409</b> |
| <i>Piezo1</i>                                                           | Mouse   | Qiagen, S104420402        |
| <i>Piezo1</i>                                                           | Mouse   | Qiagen, S100814807        |
| <i>Piezo1</i>                                                           | Mouse   | Qiagen, S100814821        |

N.B. The highlighted *Piezo1* siRNA (S104420409) was used for most of the experiments. The other three were used as validators of our obtained results.

### RNA Extraction and Reverse Transcription

RNA was extracted from cells using the RNeasy mini kit as per manufacturer's requirements (Qiagen. Ref: 217004). Reverse transcription was carried out using PrimeScript RT Master Mix (Takara Bio, Otsu, Japan. Ref: RR036A). Optical density analysis using a Nanodrop ND-1000 spectrophotometer (Labtech, UK) quantified RNA concentration. Samples were then loaded to a PCR thermal cycler (Takara, Dicemini). The resulting cDNA was then diluted 1:9 to obtain a working dilution for RT-qPCR analysis.

### Real-time Quantitative PCR (RT-qPCR)

Primers were designed using the Takara Bio Perfect Real Time Support System (Takara Bio, Table 2). Primers were diluted to 50  $\mu$ M in ddH<sub>2</sub>O and stored at -20°C. Real-time RT-qPCR was performed on the cDNA (Thermal Cycler Dice Real Time System IIMRQ, Takara Bio) using Takara SYBR Premix Ex Taq II (Takara Bio. Ref: RR802A). 12.5  $\mu$ l of SYBR Premix Ex were added to each RT-qPCR well. 8.5  $\mu$ l of ddH<sub>2</sub>O and 2  $\mu$ l of the corresponding primers were then added (a final concentration of 2  $\mu$ M per primer). 2  $\mu$ l of the respective cDNA was then added to the appropriate wells, bringing the total volume to 25  $\mu$ l per well. The RT-qPCR cycle consisted of 95°C for 30 s (for enzyme activation), followed by 40 cycles at 95°C for 5 s and a qPCR amplification period of 30 s at 60°C. The relative fold change of expression was calculated by the comparative threshold cycle (CT) method using Takara Thermal Cycler Dice Real Time System Software Ver. 4.00 (Takara Bio). To normalise for the amount of total RNA present in each reaction, *Gapdh* was used as an internal standard.

Table 2. RT-qPCR primers

| Gene            | Species | Forward primer (5'-3')  | Reverse primer (5'-3')   | Reference            |
|-----------------|---------|-------------------------|--------------------------|----------------------|
| <i>Gapdh</i>    | Mouse   | TGTGTCCGTGGATCTGA       | TTGCTGTTGAAGTCGCAGGAG    | Takara Bio, MA050371 |
| <i>Piezo1</i>   | Mouse   | CTTTATCATGAAGTGCAGCCGAG | CCAGATGATGGCGATGAGGA     | Takara Bio, MA125411 |
| <i>Myomaker</i> | Mouse   | CATGCGCCGTGACATTCTG     | AAGCATTGTGAAGGTCGATCTCTG | Takara Bio, MA131293 |
| <i>Myomixer</i> | Mouse   | GAATCCACCGCAGGCAAA      | ACCATCGGGAGCAATGGAAC     | Takara Bio, MA101853 |

### *Piezo1* activation

In order to induce *Piezo1* activation, early forming myotubes were subjected to the *Piezo1* specific agonist Yoda1 (Cayman Chemical Company. Ref: 21904) diluted in dimethyl sulfoxide (DMSO, Sigma. Ref: D2650-5x5ML). This consisted of a 24-hour incubation period in differentiation medium at high confluency (10,000 cells/well). By this point myoblasts seeded at high confluency, begin to show myotube formation in the relatively small 96-well plates. These early formed myotubes were then administered Yoda1. Yoda1 binds the agonist transduction motif (ATM), located at the pore domain of the *Piezo1* channel [17]. With each subunit displaying such motif, Yoda1 has potentially three binding sites. This phase of the investigation consisted of two main variables 1) drug

concentration and 2) duration of time cells were incubated with the drug. Five concentrations were chosen in order to cover an increasing spectrum of Yoda1 final concentration, these were: 5, 10, 30 and 100  $\mu$ M diluted in differentiation medium. Preliminary findings from the group found that a 24-hour incubation with any of the concentrations chosen, led to complete abolishment of myotube maturation (data not show). Thus, time-points thought to have potential to maximise myoblast fusion/myotube maturation were tested. The incubation time-points were set for 1 and 30 min, 1 and 4 hours. Control cohorts containing only DMSO were incubated at the allocated times to allow comparisons to be made within each condition. Following the incubation of Yoda1 or DMSO, cells were cultured in the differentiation medium for a further 2 days (i.e. myotubes were analysed 3 days post initial induction of differentiation).

### *Immunolabelling*

Throughout the protocol, all washes were performed with Dulbecco's phosphate-buffered saline (DPBS, Gibco, Dulbecco's Phosphate Buffered Saline, Thermo Fisher Scientific, Ref: 14190-144). Cells were fixed with 4% paraformaldehyde for 15 min. Samples were then washed three times with PBS (5 minutes each wash) and permeabilised for 15 min using 0.5% triton-X100/PBS (Sigma-Aldrich. Ref: T9284-500ml). Cells were blocked for 1 hour in 5% bovine serum albumin (BSA, Sigma-Aldrich Ref: A7906-100G). Primary antibodies (diluted to the working concentration in PBS) (Table 3) were added to the samples and incubated overnight at 4°C. Primary antibodies were decanted, the samples were washed three times and appropriate secondary antibodies diluted to the working concentration in PBS added (Table 3) were added to the samples. The samples were covered with aluminium foil to avoid light exposure and left to stand at room temperature for 1 hour. Cells were washed again (three times). To visualise nuclei, the cells were incubated for 10 min at room temperature with 1  $\mu$ g/ml 4', 6-diamidino-2-phenylindole (DAPI) (Sigma. Ref: D9542-10MG) diluted 1:1000 in PBS. After a final wash with PBS (5 min), cells were replenished with PBS and stored at 4 °C until image analysis.

### *EdU incorporation*

For the evaluation of cell proliferation, cells were incubated with 5-ethynyl-2'-deoxyuridine (EdU: Invitrogen, Thermo Fisher Scientific) at 10  $\mu$ M, added in fresh proliferation medium for 2 hours at 37 °C. EdU, the alkyne-containing thymidine analog, is incorporated into DNA during active DNA synthesis. The click-iT EdU Alexa Fluor kit (Invitrogen, Thermo Fisher Scientific, Click-iT, EdU Alexa Fluor. Ref: 594 C10339) was used as per manufacturer's instructions with either the 488 (green) or 594 (red) azide to detect incorporated EdU.

### *Phalloidin labelling*

To evaluate the cytoskeleton, cells were treated with phalloidin (Invitrogen, Thermo Fisher Scientific, Alexa-Fluor. Ref: 488 A12379) diluted 1:40 in PBS. Phalloidin binds to f-actin, a major cytoskeleton protein in myofibres. Cells were incubated with phalloidin solution for 30 mins at room temperature. Cells were then washed with PBS twice for 5 min.

**Table 3. Primary and Secondary antibodies used**

| Primary antibody                              | Dilution | Reference                                         |
|-----------------------------------------------|----------|---------------------------------------------------|
| Monoclonal mouse – Myogenin                   | 1:10     | Development Studies Hybridoma Bank (DSHB), F5D-s  |
| Monoclonal mouse – MF20 (Myosin Heavy Chain)  | 1:10     | Development Studies Hybridoma Bank (DSHB), MF20-s |
| Secondary antibody                            | Dilution | Reference                                         |
| Donkey anti-mouse IgG (H+L), Alexa Fluor® 555 | 1:500    | Life Technologies, A21203                         |

#### *Image analysis and quantification*

Images were taken using a fluorescence microscope (BZ-X710, KEYENCE, Osaka, Japan). Four to five images per each well (3 wells per repeat) consistent of a total of 12-15 images per repeat were analysed. One repeat refers to one mouse. For EdU incorporation, the total number of DAPI-counterstained nuclei and total number of EdU-incorporated cells were quantified. The proportion of EdU-incorporated cells relative the total number of nuclei was subsequently expressed as percentages. The relative proportion of cells expressing Myogenin was also quantified in this manner.

The fusion index was calculated by quantifying the total number of nuclei within MyHC-positive myotubes and expressing this value as a proportion of the total number of nuclei in each field of view. As a criterion, more than two nuclei must be within a MyHC-positive myotube to be quantified for the fusion index:  $(\text{MyHC-positive myotubes containing } \geq 2 \text{ nuclei} / \text{total number of nuclei}) \times 100$ .

To measure myotube width, the “measure” tool on ImageJ imaging software was used. This allows measurements of a chosen distance to be made. Before measurement, a scale was applied to all images. On the “set scale” option pixels are converted into  $\mu\text{m}$ . Taking the fluorescence microscope and magnification into account the program determines 100  $\mu\text{m}$  to be 133.00 pixels or 0.75  $\mu\text{m}/\text{pixel}$ . Three independent images were chosen per condition. The criterion for this analysis was to choose the widest possible distance between myotube edges without the presence of any branching points. This was carried out in three independent points within the field of view. The values were then averaged.

#### *Stretch experiments and imaging of intracellular $\text{Ca}^{2+}$ level*

Stretch experiments were performed at the National Institute for Physiological Sciences (NIPS). Myoblasts were seeded (30,000 cells/chamber) on modified elastic silicone chambers (Strexcell, Ooyodonaka, Ref: STB-CH-0.02). After 24-hour incubation, cells were transfected with either control (siScrambled) or *Piezo1*-specific siRNA in proliferation medium. After overnight incubation, cells were switched to differentiation medium and cultured for a further 3 days. Stretch experiments were conducted on the third day. For *Piezo1* activation by Yoda1 administration, cells were seeded as above. Following the initial overnight incubation, cells were switched to differentiate and the resulting myotubes were analysed 3 days post differentiation induction.

For  $\text{Ca}^{2+}$  imaging, Fura 2-AM (Invitrogen) with 10% Pluronic® F-127 (Molecular Probes, USA) diluted in double distilled water ( $\text{ddH}_2\text{O}$ ), was administered to EDL- and SOL-derived myotubes followed by a 30-min incubation time. Chambers were attached

to an extension device (modified version of STB-150, Strex) on the microscope stage. Stretch stimulation was applied using a pre-set stretch speed and distance. After an initial 1 min rest period (0% stretch), stretch was applied at 3% (0.3 mm), 6% (0.6 mm) and 9% (0.9 mm) for 1 min followed by a 1-min resting period in between. During the initial 0% stretch timepoint, Yoda1 cohorts were administered with 30  $\mu$ M of the agonist before being subjected to stretch. Ionomycin (Sigma-Aldrich) at 5  $\mu$ M was applied at the final step in each experiment for normalisation and to check cell viability.

Changes in intracellular calcium  $[Ca^{2+}]_i$  were measured by ratiometric imaging with Fura 2-AM at 340 and 380 nm, and the emitted light signal was read at 510 nm. Images were then analysed on ImageJ imaging software. Three independent myotubes from each condition were selected and analysed. The changes in ratios were calculated by subtracting basal values from peak values. The values were then normalised to ionomycin data.

### *Statistical analysis*

Data is presented as mean  $\pm$  SEM from at least three experiments (at least three mice). Significance was assessed by either paired Student's t-test or one-way ANOVA followed by followed by the Tukey-Kramer post-hoc; wherein p-values of  $< 0.05$  were considered to be statistically significant. A paired t-test was adopted when comparing effects within the same group e.g., analysing the effects of siRNA mediated down-regulation of *Piezo1* versus siRNA controls in murine derived myoblasts. A one-way ANOVA was implemented when two or more independent groups were analysed, for example; comparing the effects of varying agonist concentrations across different timepoints.

### 3. Results

#### 3.1 *Piezo1* is upregulated during myoblast differentiation

To investigate the expression level of *Piezo1* during myogenic progression we used murine fast EDL and slow SOL muscle SC-derived primary myoblasts (Figure 1a). The expression of EDL muscle SC-derived primary myoblasts showed a significant increase in mRNA expression of *Piezo1* in myotubes cultured at 3 days of differentiation, compared to the expression level in proliferating myoblasts (Figure 1b). In SOL-derived myoblasts, *Piezo1* expression rapidly increased after 24 h, suggesting an earlier function of *Piezo1* in slow muscle myogenesis. Indeed, *Piezo1* was found upregulated at both 24 h (4-fold) and 72 h of differentiation SOL-derived myoblasts compared to EDL-derived myoblasts (Figure 1b) where *Piezo1* increased by 2-fold. Thus, *Piezo1* expression increases during myoblast differentiation.

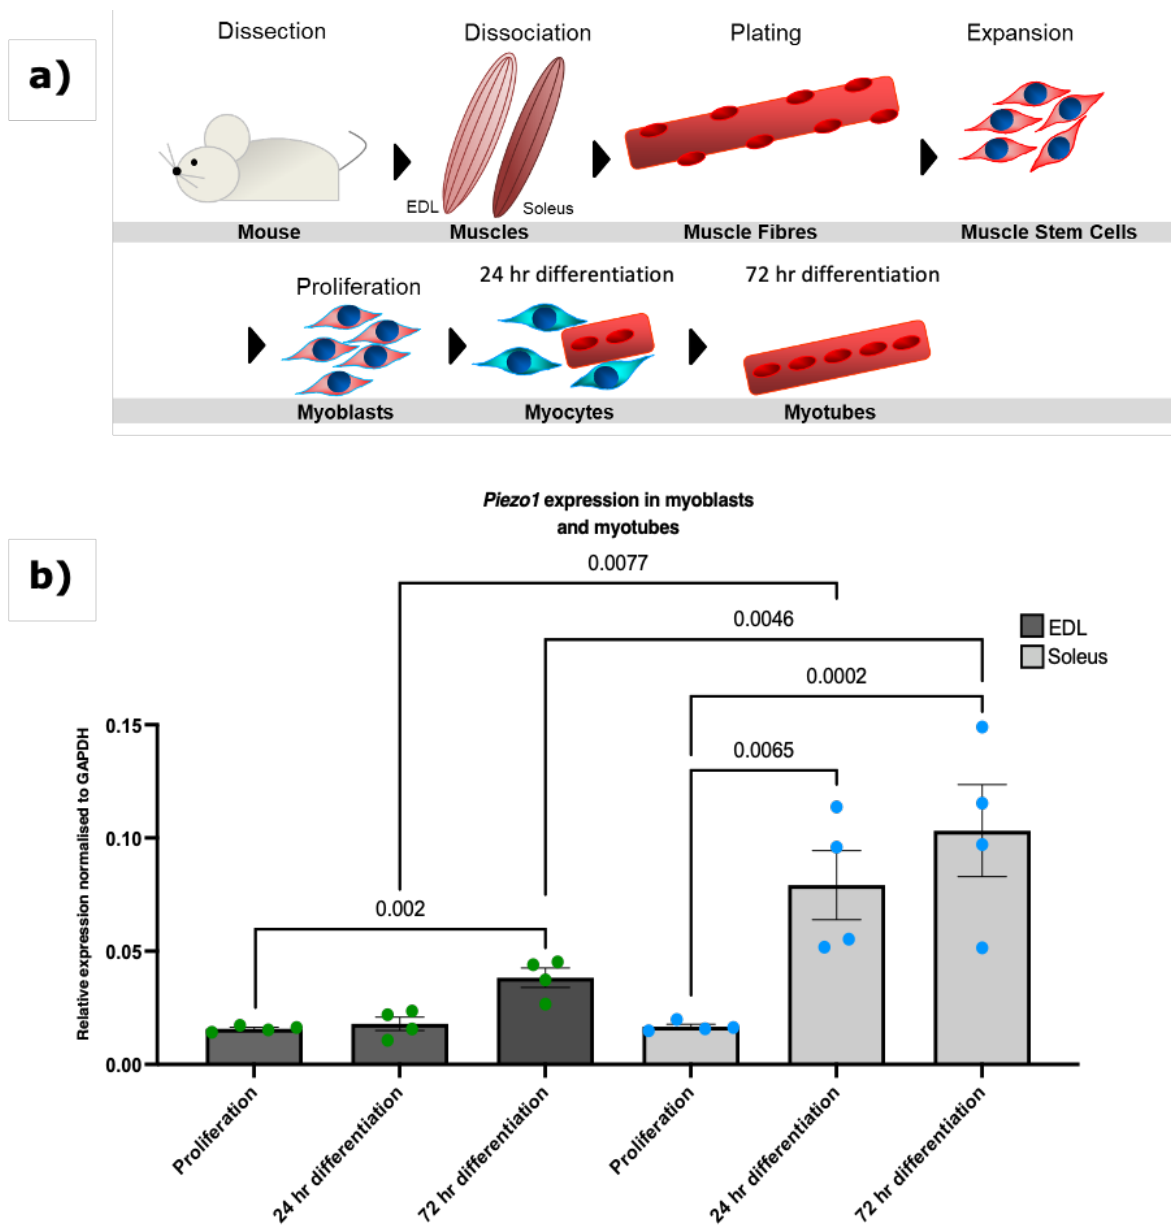

**Figure 1. *Piezo1* expression increases in differentiating SC-derived myoblast.** (a) Schematic representation of muscle isolation and SC-derived myoblast expansion procedure. (b) Relative fold changes in expression of *Piezo1* in myoblasts from EDL (dark grey bars, green dots) and SOL muscle (light grey bars, blue dots), during proliferation and through differentiation; 24 hours (Day 1) and 72 hours (Day 3) in differentiation medium. Values were normalised to *Gapdh*. Data is presented as mean  $\pm$  SEM from four experiments (n = 4 mice). p values are annotated above graphs.



### 3.2 *Piezo1* regulates $Ca^{2+}$ influx during myogenesis

The *Piezo1* channel permeates  $Ca^{2+}$  influx at a greater preference than other cations ( $Na^+$ ,  $K^+$  and  $Mg^{2+}$ ) [5].  $Ca^{2+}$  is itself a crucial regulatory of muscle contraction and earlier during muscle formation and differentiation/fusion [18-20]. Thus, given accumulation of *Piezo1* mRNA in differentiating myoblasts, we sought to assess the dynamics of  $Ca^{2+}$  influx ( $[Ca^{2+}]_i$ ) upon modulation of *Piezo1* activity in cultured myotubes. Using the customised stretch silicon bio-chambers [21], we cultured myotubes derived from both EDL- and SOL-derived myoblasts. We then divided the samples into two groups; those administered *Piezo1* specific siRNA (*Piezo1*-knockdown) and those given the *Piezo1* agonist Yoda1 (at 30  $\mu$ M). Results were compared against their respective controls (no Yoda1 or siRNA controls). The chambers were subjected to incremental bouts of stretch, with a minute rest in between each stretch. Throughout the experiment we measured  $[Ca^{2+}]_i$  (Figure 2). *Piezo1* siRNA-mediated knockdown led to nearly 50% and 40% reduction on *Piezo1* mRNA in EDL-derived myoblasts (Supplementary Figure 1a) and SOL-derived myoblasts (Supplementary Figure 1b) respectively, compared to control conditions. Under control conditions (siRNA controls and no Yoda1), upon mechanical stretch,  $[Ca^{2+}]_i$  increases significantly in both EDL-derived and SOL-derived myotubes compared to no-stretch (0%) controls (Figure 2a-d and 2e-h). Of note, for both EDL- and SOL-derived control myotubes only stretch bouts over 3%, showed a significant increase in  $[Ca^{2+}]_i$ . Reduction of *Piezo1* severely suppressed  $[Ca^{2+}]_i$  in response to stretch compared to control cells (siRNA controls) (Figures 2a,c and 2b,d). Indeed, the progressive increase in  $[Ca^{2+}]_i$  was completely abolished in EDL-derived myotubes (Figure 2c) with neither a 6%, nor a 9% stretch eliciting a significant increase in  $[Ca^{2+}]_i$  (Figure 2c). Similarly, reduction of *Piezo1* in SOL-derived myotubes (Figure 2d), showed a significant decrease in  $[Ca^{2+}]_i$  at all stretch bouts (Figure 2e), with only *Piezo1*-knockdown myotubes showing increased  $[Ca^{2+}]_i$  at the 9% stretch condition compared to 3% stretch. Thus, *Piezo1* is essential for  $Ca^{2+}$  influx during stretch.

Yoda1-mediated activation of *Piezo1* was able to overcome the mechanical threshold imposed in control cohorts. Indeed, at bouts of 3% stretch, EDL- and SOL-derived myotubes treated with Yoda1 (Figure 2e,g and 2f,h) showed a significantly higher  $[Ca^{2+}]_i$ , compared to untreated 3% stretch counterparts. This increase in  $[Ca^{2+}]_i$  persisted at higher stretch bouts, with both EDL- and SOL-derived myotubes exhibiting higher  $[Ca^{2+}]_i$  at 6% and 9% stretch bouts compared to untreated stretched counterparts (Figure 2g and h). In summary, *Piezo1* expression and activity are crucial for  $Ca^{2+}$  regulation in muscle function.

392  
393  
394  
395  
396  
397  
398  
399  
400  
401  
402  
403  
404  
405  
406  
407  
408  
409  
410  
411  
412  
413  
414  
415  
416  
417  
418  
419  
420  
421  
422  
423  
424  
425  
426  
427  
428  
429  
430  
431  
432  
433  
434  
435  
436  
437  
438  
439  
440  
441  
442  
443  
444  
445

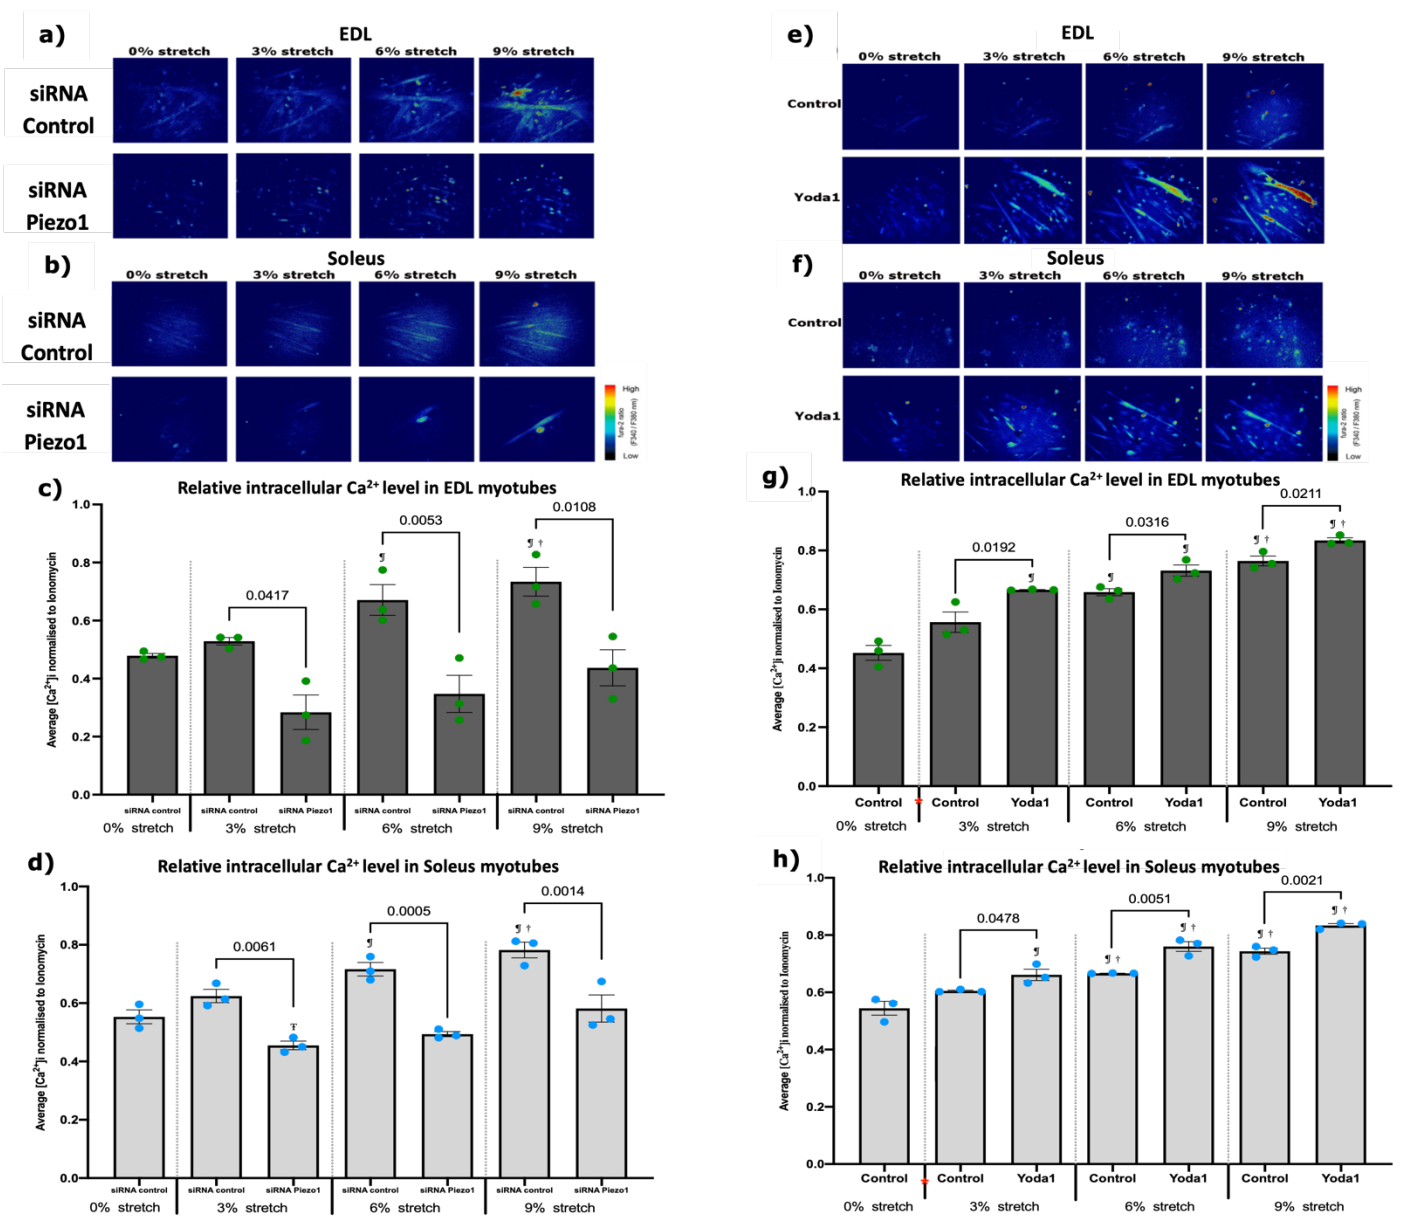

**Figure 2. Modulation of Piezo1 alters stretch-mediated increase of intracellular Ca<sup>2+</sup> in myotubes.** (a) and (b) Representative images of intracellular Ca<sup>2+</sup> imaging in EDL and SOL-derived myotubes. Myoblasts were transfected with 10 nM of either control-siRNA (top panels) or *Piezo1*-siRNA (bottom panels). After overnight incubation, cells were incubated for a further 72 hours in differentiation medium. Fura 2-AM was administered to myotubes followed by a 30-min incubation time. Stretch was then applied at 3% (0.3 mm), 6% (0.6 mm) and 9% (0.9 mm) for 1 min followed by a 1-min resting period in between. Ionomycin at 5 μM was then applied. Side vertical bar shows Fura 2-AM ratio emittance from low to high. (c) and (d) Average changes in the intracellular Ca<sup>2+</sup> level ([Ca<sup>2+</sup>]<sub>i</sub>) calculated by difference between base and peak pixel value normalised to ionomycin. (e) and (f) Representative images of Ca<sup>2+</sup> imaging in EDL and SOL-derived myotubes. Fura 2-AM was administered to myotubes followed by a 30-min incubation time. Stretch was then applied at 3% (0.3 mm), 6% (0.6 mm) and 9% (0.9 mm) for 1 min followed by a 1-min resting period in between. During the initial 0% stretch timepoint, Yoda1 cohorts were administered with 30 μM of the agonist (red \*) before being subjected to stretch. Ionomycin at 5 μM was then applied. Side vertical bar shows Fura 2-AM ratio emittance from low to high. (g) and (h) Average changes in the intracellular Ca<sup>2+</sup> level ([Ca<sup>2+</sup>]<sub>i</sub>), difference between base and peak pixel value normalised to ionomycin. Data is mean ± SEM from three experiments (n = 3 mice). p values are annotated above graphs showing significance compared to control at each stretch condition. ¶: Significant difference at p < 0.05 compared to 0% stretch counterparts. †: Significant difference at p < 0.05 compared to 3% stretch counterparts. ‡: Significant difference at p < 0.05 compared to 9% stretch in *Piezo1*-siRNA conditions using one-way ANOVA followed by the Tukey-Kramer post-hoc.

446  
447  
448  
449  
450  
451  
452  
453  
454  
455  
456  
457  
459  
460  
461  
462  
463  
464  
465  
466  
467  
468  
469  
470  
471  
472  
473  
474  
475  
476  
477  
478  
479  
480  
481  
482  
483  
484  
485  
486  
487  
488  
489  
490  
491  
492  
493  
494  
495  
496  
497  
498  
499  
500

### 3.3 *Piezo1* is dispensable for myoblast proliferation and early commitment to differentiation 501

*Piezo1* expression peaks at later myogenic steps, where it regulates calcium influx 502 during contraction. However, whether *Piezo1* participates in earlier phases of myogenesis 503 is unclear. Thus, we set out to evaluate the effects of manipulating *Piezo1* on proliferation 504 and onset of myogenic program. Knockdown of *Piezo1* had no overt effect on the proliferation 505 rate of both EDL- and SOL-derived myoblasts (Supplementary Figure 1c-f), thus 506 *Piezo1* is dispensable for muscle cell proliferation. Next, we investigated whether reduction 507 of *Piezo1* could alter the entrance into differentiation stage by analysing the accumulation 508 of the transcription factor Myogenin. Neither EDL-derived or SOL-derived myoblasts 509 showed a significant difference in the relative proportion of Myogenin-positive cells 510 between *Piezo1*-knockdown and control-siRNA treated conditions (Figure 3a-d), suggesting 511 that *Piezo1* does not participate in the onset of myoblast differentiation. *Piezo1* 512 seemed to exert most of its expression during differentiation, thus in order to address 513 potential compensatory effect of *Piezo2* in response to *Piezo1* knockdown, we measured 514 *Piezo2*'s expression in EDL- and SOL-derived myotubes (Supplementary Figure 1g and 515 1h). We again confirmed the reliability in our method of siRNA-mediated knockdown by 516 showing significant reduction of *Piezo1* expression in both EDL- and SOL-derived myo- 517 tubes (Supplementary Figure 1i and 1j). Importantly, RT-qPCR analysis revealed that *Pi-* 518 *ezo1* knockdown does not alter *Piezo2* expression in EDL- and SOL-derived myotubes 519 (Supplementary Figure 1g and 1h) indicating that *Piezo2* does not compensate for *Piezo1* 520 suppression. Moreover, *Piezo2* expression was extremely low in both EDL and SOL sam- 521 ples, confirming previously published data [5, 21]. 522

Myoblast fusion requires extensive membrane remodelling together with mechanical 523 stress; thus, we next evaluated the effect of *Piezo1* suppression on myotube formation and 524 maturation. Knockdown of *Piezo1* led to a dramatic reduction in myoblast fusion and sub- 525 sequent hinderance in the formation of both EDL- and SOL-derived myotubes (Figure 3e- 526 3h). In line with reduced myoblast fusion, EDL- and SOL-derived myoblasts (Figure 3i-l) 527 showed reduced expression of the fusogene *Myomaker* [23-28] (Figure 3i and 3k) suggest- 528 ing alteration of fusion machinery at the molecular level. Expression of *Myomixer* showed 529 a trend to decrease (Figure 3j and 3l). Moreover, knockdown of *Piezo1* in early formed 530 myotubes confirmed a significant reduction in the fusion index, compared to control- 531 siRNA conditions (Figure 3m-p). In summary, dysregulation of *Piezo1* expression reduces 532 the ability of cells to fuse into new or existing myotubes. 533

534  
535  
536  
537  
538  
539  
540  
541  
542  
543  
544  
545  
546  
547  
548  
549  
550  
551  
552  
553  
554

### 24 hr differentiation

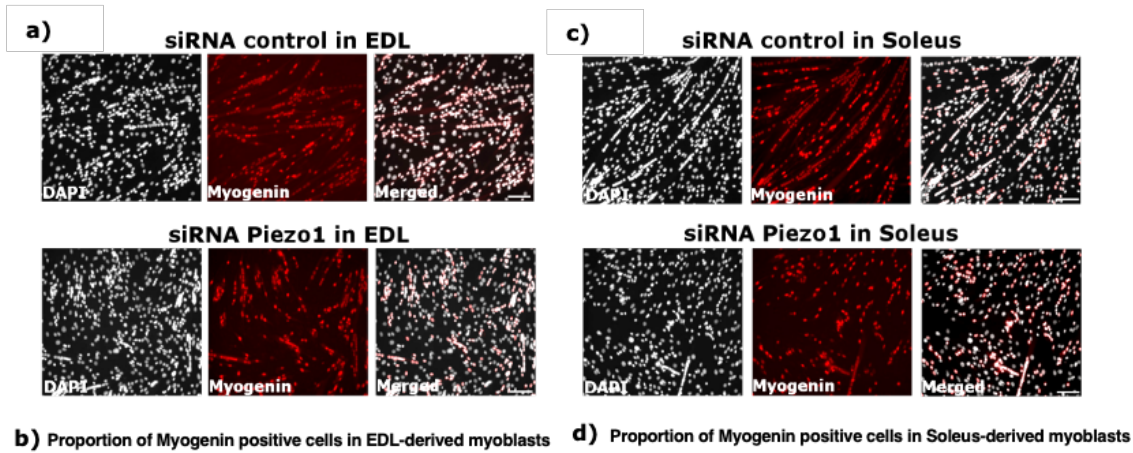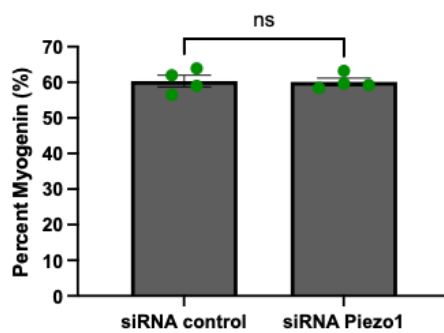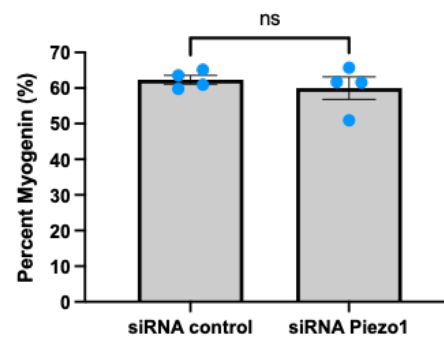

### Myotube Formation

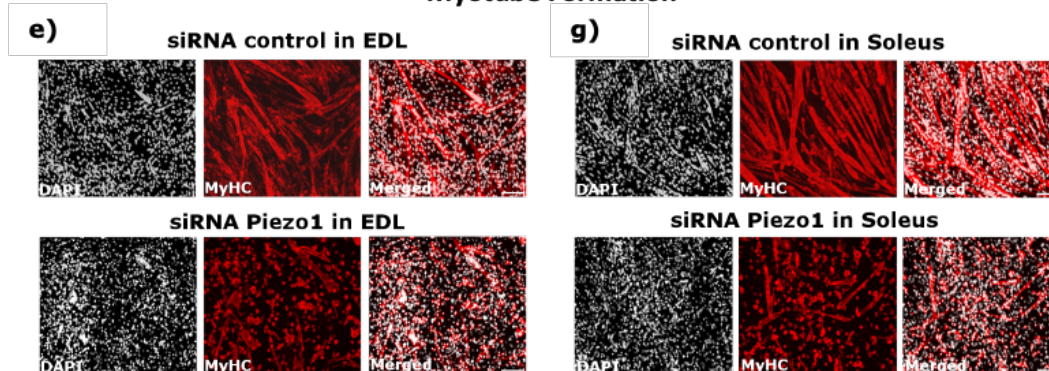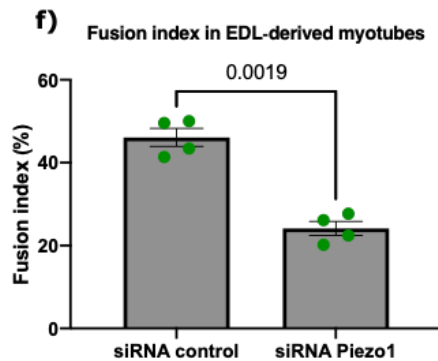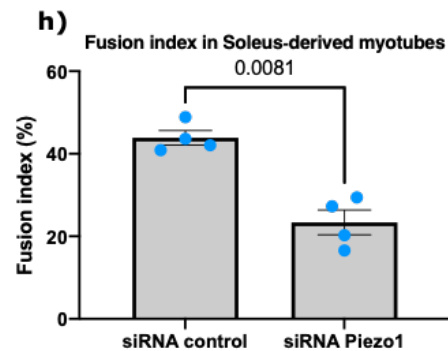

555  
556  
557  
558  
559  
560  
561  
562  
563  
564  
565  
566  
567  
568  
569  
570  
571  
572  
573  
574  
575  
576  
577  
578  
579  
580  
581  
582  
583  
584  
585  
586  
587  
588  
589  
590  
591  
592  
593  
594  
595  
596  
597  
598  
599  
600  
601  
602  
603  
604  
605  
606  
607  
608

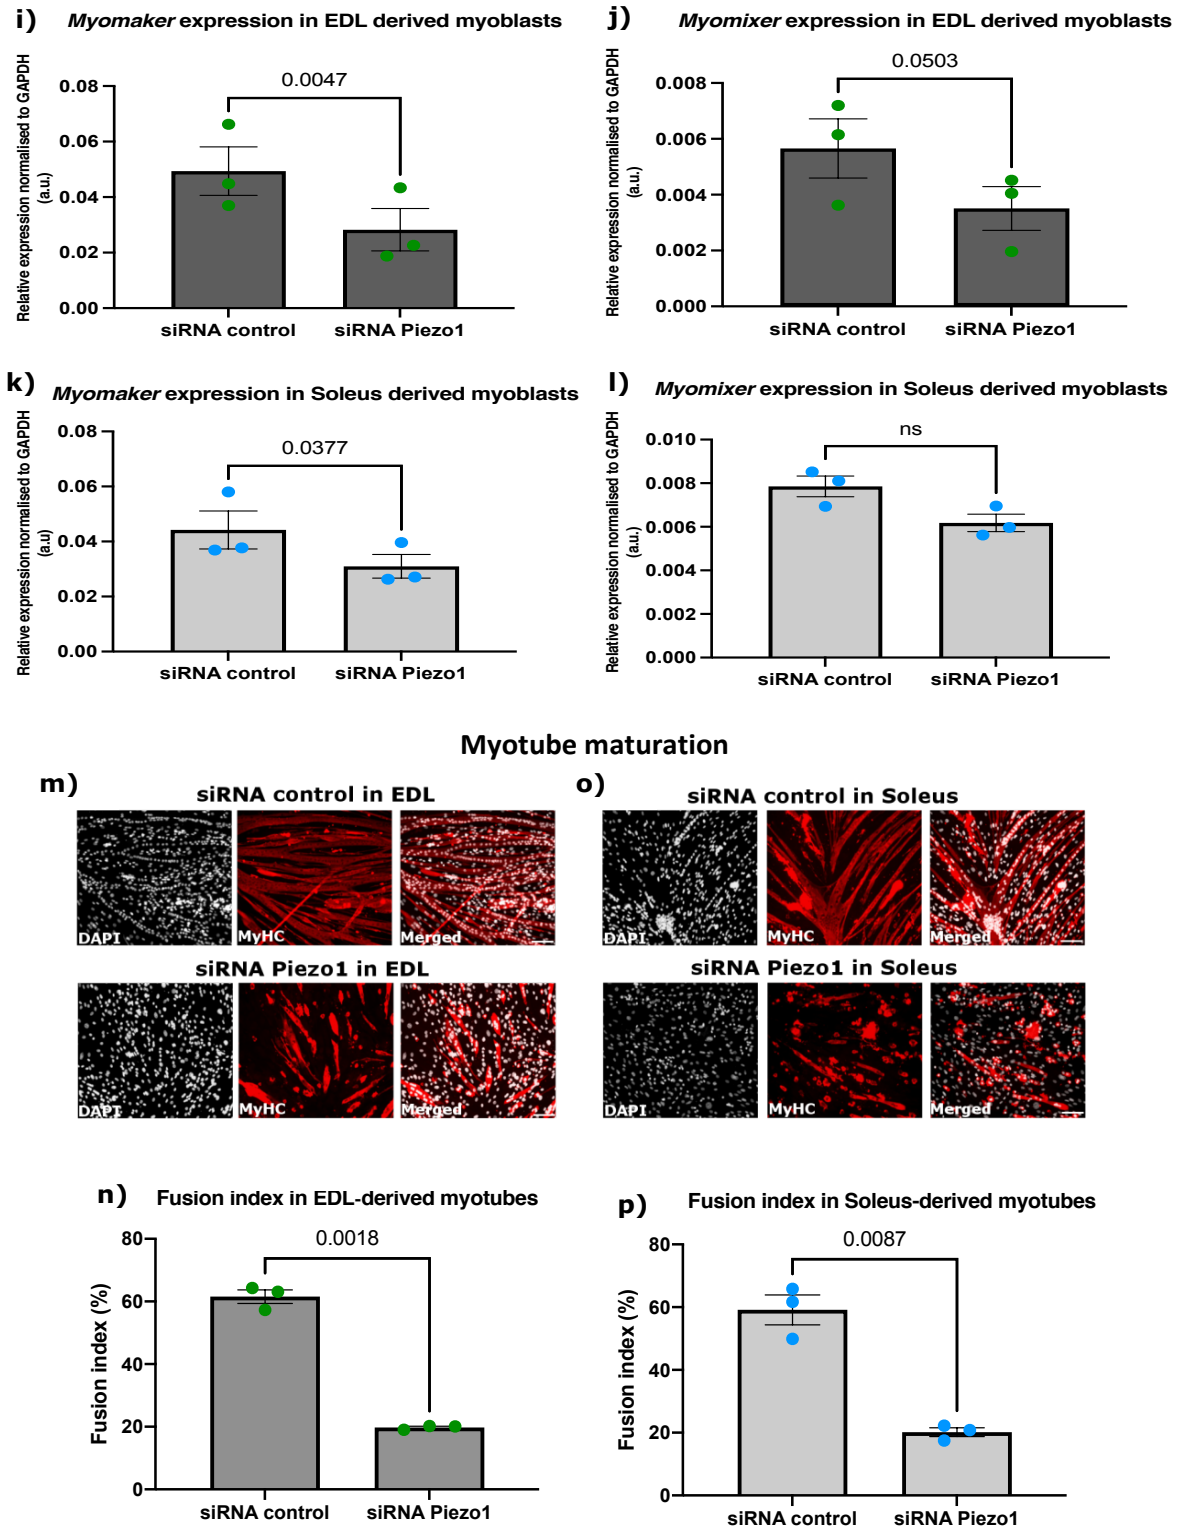

**Figure 3. *Piezo1* knockdown reduces myoblast fusion and expression of fusogens.** (a) and (c) Representative images of EDL and SOL-derived myoblasts transfected with 10nM of control-siRNA (siRNA control) or *Piezo1*-siRNA. Following overnight incubation, cells were incubated for a further 24 hours in differentiation medium, immunolabelled for Myogenin (red panels) and counterstained with DAPI (black and white panels). Scale bar is 100  $\mu$ m. (b) and (d) Percentage proportion of Myogenin-positive cells relative to total nuclei. (n = 4 mice). (e) and (g) Representative images of myotubes from EDL and SOL, transfected with 10nM of control-siRNA or *Piezo1*-siRNA. Following overnight incubation, cells were incubated for a further 72 hours. Cells were immunolabelled for Myosin heavy chain (MyHC) (red panels) and counterstained with DAPI (black and white panels). (f) and (h) The fusion index was calculated by counting the total number of nuclei within each myotube and representing this as a percentage relative to the total number nuclei in the image taken (n = 4 mice). (i)

609  
610  
611  
612  
613  
614  
615  
616  
617  
618  
619  
620  
621  
622  
623  
624  
625  
626  
627  
628  
629  
630  
631  
632  
633  
634  
635  
636  
637  
638  
639  
640  
641  
642  
643  
644  
645  
646  
647  
648  
649  
650  
651  
652  
653

654  
655  
656  
657  
658  
659  
660  
661  
662

- **l**) Relative fold changes in expression of EDL-derived myoblasts (**i** and **j**) and SOL-derived myoblasts (**k** and **l**). Cells were transfected with 10 nM of either control-siRNA (siRNA control) or *Piezo1*-siRNA (siRNA *Piezo1*). After overnight incubation, cells were incubated for a further 24 hours. The expression of the fusogenic protein genes *Myomaker* and *Myomixer* were then analysed. Values were normalised to Gapdh. (n = 3 mice). (**m**) and (**o**) Representative images of EDL and SOL-derived myotubes. Early forming myotubes were transfected with 10nM of control-siRNA (siRNA control) or *Piezo1*-siRNA (siRNA-*Piezo1*). Following overnight incubation, cells were incubated for a further 48 hours, immunolabelled for Myosin heavy chain (MyHC) (red panels) and counterstained with DAPI (black and white panels). Scale bar is 100  $\mu$ m. (**n**) and (**p**) Bar graphs display the fusion index (n = 3 mice). Data is mean  $\pm$  SEM. p values are annotated above graphs showing significance (or ns, not significant) compared to siRNA control conditions using a 2-tailed paired student t-test.

### 3.3 *Piezo1* activity is finely regulated during myoblast fusion

Knockdown of *Piezo1* reduces myoblast fusion and alters  $Ca^{2+}$  influx. Thus, we next assessed the dose-dependent effect of *Piezo1* activation. Early forming myotubes were subjected to varying concentrations of Yoda1 over a period of time. After each allocated timepoint, the agonist containing medium was removed and replenished with fresh differentiation medium and incubated for a further 2 days (Figure 4).

Strikingly, a 1-minute treatment of Yoda1 enhanced significantly cell fusion both in EDL- and SOL-derived myotubes at 30  $\mu$ M and 100  $\mu$ M of Yoda1 (Figure 4a-d). However, a 30 min treatment with the highest dose (100  $\mu$ M) of Yoda1 had the opposite effect, reducing fusion index (Supplementary Figure 2), suggesting that *Piezo1* activity must be finely tuned to achieve efficient fusion and myotube maturation. Indeed, both EDL- and SOL-derived myotubes incubated at 100  $\mu$ M beyond the 1 min timepoint, showed a significant decrease in fusion, compared to vehicle-treated controls (Supplementary Figure 2). After 1 h of incubation timepoint, EDL-derived myotubes exhibited increased fusion efficiency at 5  $\mu$ M, 10 $\mu$ M and 30  $\mu$ M of Yoda1 treatment, compared to DMSO controls (Figure 4b). Similarly, SOL-derived myotubes incubated with Yoda1 for 1 hour showed an increase in fusion at 5  $\mu$ M, 10  $\mu$ M and 30  $\mu$ M, compared to DMSO controls (Figure 4c and Supplementary Figure 2). Continued *Piezo1* activation (4 h) showed a significant decrease in fusion of EDL-derived myotubes at a Yoda1 concentration of 30  $\mu$ M compared to DMSO control (Supplementary Figure 2a and 2c).

At molecular level, *Piezo1* expression was increased in both EDL- and SOL-derived myotubes post Yoda1 administration (Supplementary Figure 6a and 6b). *Myomaker* expression also paralleled *Piezo1* upregulation in both EDL- and SOL-derived myotubes (30  $\mu$ M 30 min incubation and 10 $\mu$ M 1 h incubation). Interestingly *Myomixer*, although showed a trending increase in expression, did not reach statistical significance. Taken together, our data show that fine regulation of *Piezo1* activity is a key step during differentiation dynamics.

We noticed that induced activation of *Piezo1* appeared to affect myotube size, although increasing myoblast fusion. In order to address this, we compared the myotube width of these samples to DMSO controls (Figure 4e-h). Interestingly, both EDL- (Figure 4e and 4f) and SOL-derived myotubes (Figure 4g and 4h) showed reduced myotube width compared to controls when treated with Yoda1. Both EDL- and SOL-derived myotubes, showed that Yoda1 treated cells, on average, have a greater proportion of smaller myotubes (Figure 4i-j) compared to controls which have a higher distribution of larger myotubes. A similar pattern was observed in the rest of the Yoda1 treated cohorts that displayed increased fusion (Supplementary Figure 3). Taken together, over activation of *Piezo1* unbalances myoblast fusion and myotube size.

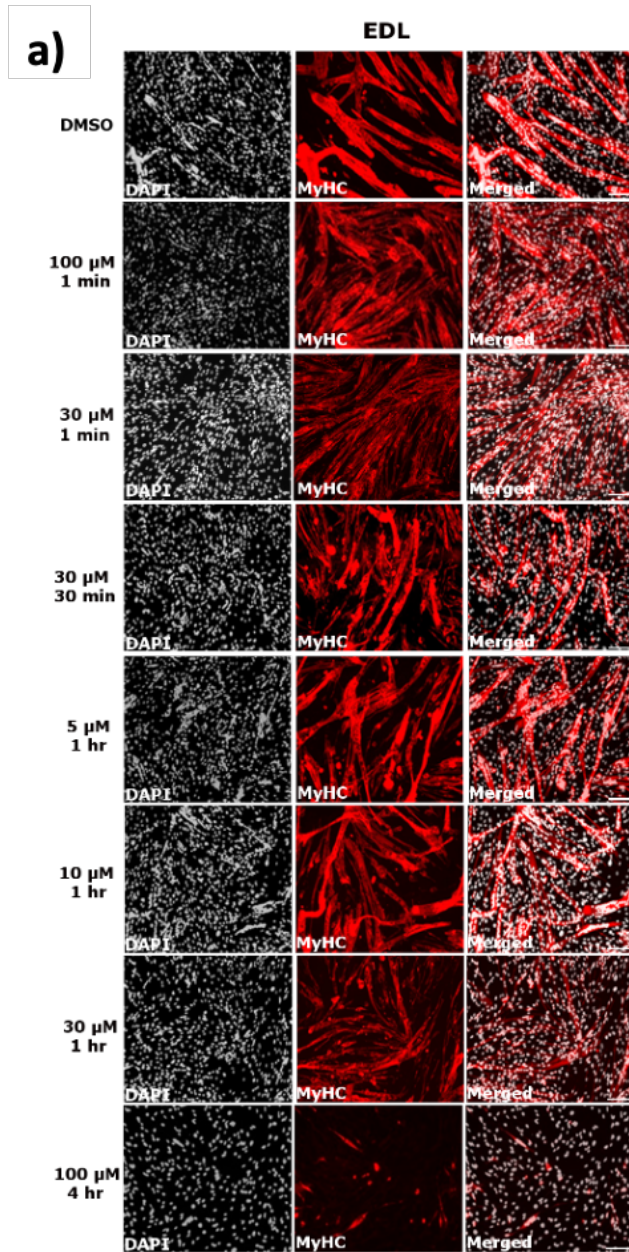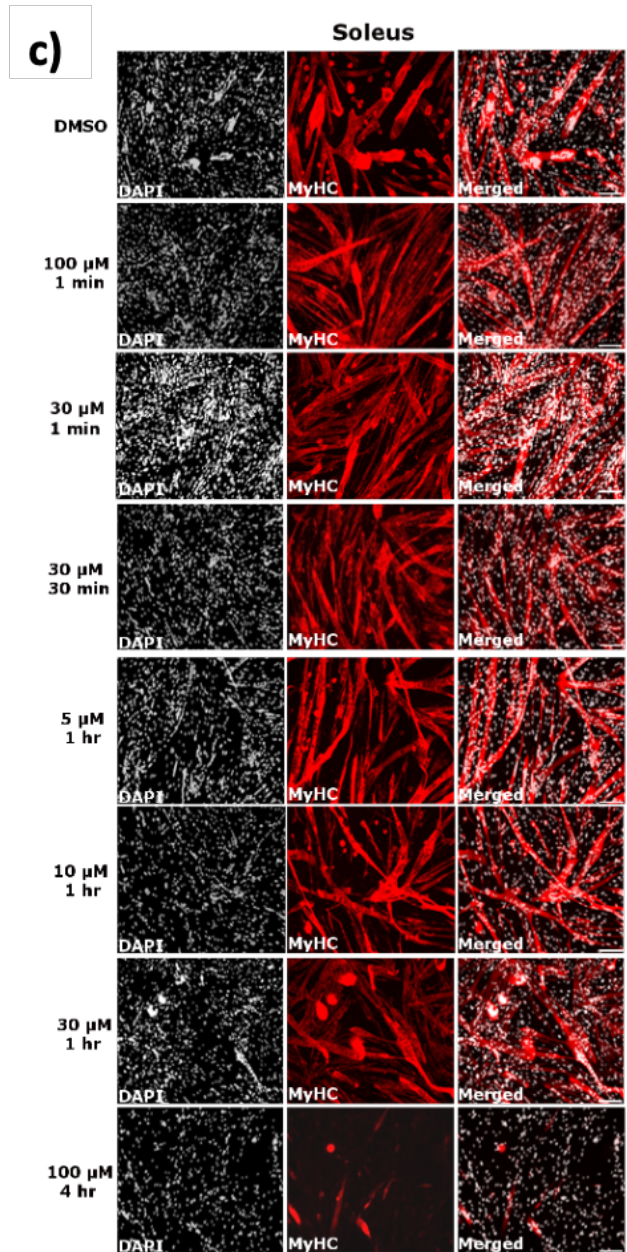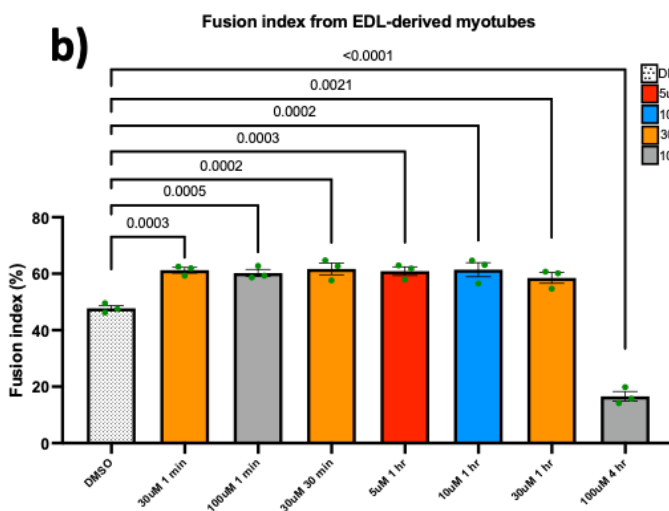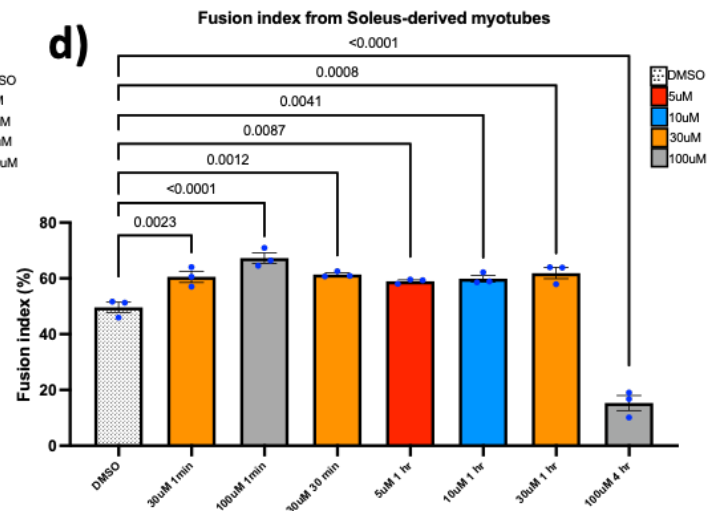

717  
718  
719  
720  
721  
722  
723  
724  
725  
726  
727  
728  
729  
730  
731  
732  
733  
734  
735  
736  
737  
738  
739  
740  
741  
742  
743  
744  
745  
746  
747  
748  
749  
750  
751  
752  
753  
754  
755  
756  
757  
758  
759  
760  
761  
762  
763  
764  
765  
766  
767  
768  
769  
770

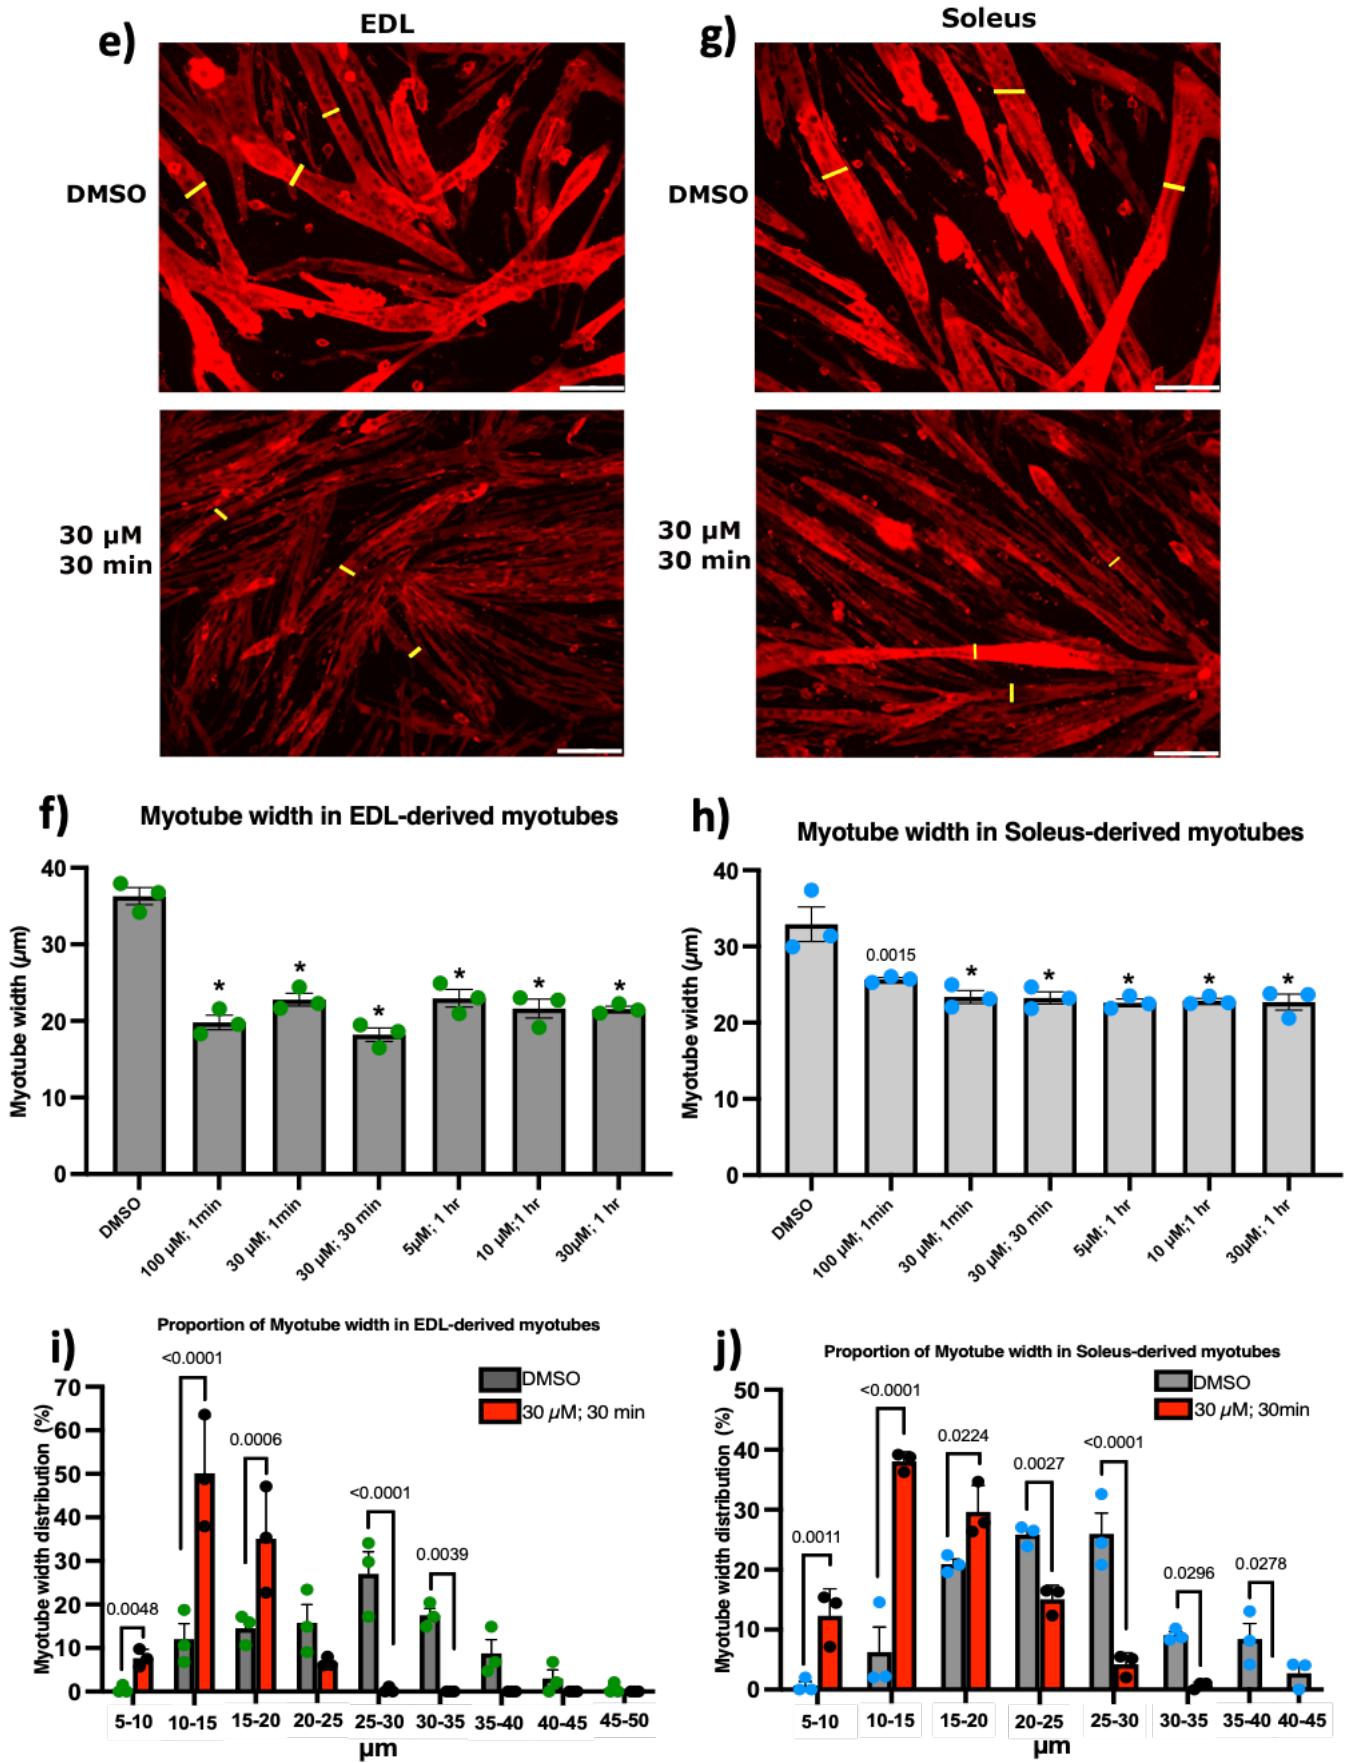

771  
772  
773  
774  
775  
776  
777  
778  
779  
780  
781  
782  
783  
784  
785  
786  
787  
788  
789  
790  
791  
792  
793  
794  
795  
796  
797  
798  
799  
800  
801  
802  
803  
804  
805  
806  
807  
808  
809  
810  
811  
812  
813  
814  
815  
816  
817  
818  
819  
820  
821  
822  
823  
824



**Figure 4. Piezo1 activation increases myoblast fusion at the expense of myotube syncytial maturation.** (a) and (c) Representative images of cohorts at relevant timepoints and concentrations, immunostained for Myosin heavy (MyHC) (red panels) and counterstained with DAPI (black and white panels). Micrographs taken at x20 magnification. Scale bar is 100  $\mu\text{m}$ . (b) and (d) Bar graphs displaying fusion index in EDL- and SOL-derived myotubes at the relevant time point and concentration variables. Yoda1 values are compared to DMSO controls at 1 min. Please refer to Supplementary Figure 2 for cross comparison of all concentrations against their respective controls at each timepoint. (e) and (g) Representative images of EDL- and SOL-derived myotubes immunolabelled for MyHC. We measured the width of the myotubes to quantify potential differences between Piezo1-activated cohorts (lower panels) and DMSO controls (upper panels). This was achieved by taking three independent points within a field of view (yellow bars) and measuring the distance from one side of the myotube to the other. Example pictures from DMSO controls and 30  $\mu\text{M}$  of Yoda1 incubated for 30 min are displayed. Scale bar is 100  $\mu\text{m}$ . (f) and (h) Average myotube width in DMSO and Piezo1 activated samples. (i) and (j) Proportion of myotube width in EDL- and SOL-derived myotubes. Myotube width was divided into incremental bins of 5  $\mu\text{m}$  and represented as percentages relative to the total number of myotubes counted. Values are mean  $\pm$  SEM. p values are annotated above graphs showing significance compared to DMSO controls using one-way ANOVA tests followed by the Tukey-Kramer post-hoc. n = 3 mice. For (f) and (h) asterisks (\*) denote significance at  $p < 0.0001$  compared to DMSO controls conditions. Please note that only cohorts which showed increased myoblast fusion in both EDL- and SOL-derived myotubes from Figure 4a-d are displayed.

### 3.4 Deregulation of Piezo1 alters cytoskeletal remodelling during differentiation

Along with myoblast fusion, myogenic differentiation requires extensive cellular remodelling, and previous research places Piezo1 regulation as a key player in cytoskeletal homeostasis [22, 23]. To understand whether Piezo1 contributes to regulate cytoskeletal structures, including f-actin, we examined f-actin accumulation as a proxy to evaluate the extent of cytoskeletal reorganisation during myogenic differentiation in EDL- and SOL-derived myotubes. *Piezo1*-knockdown showed a significant decrease in the accumulation of f-actin compared to control-siRNA (Supplementary Figure 4a-d), suggesting that reduction of *Piezo1* alters cytoskeletal dynamics. In contrast, f-actin accumulation was unaffected by Piezo1 over-activation (Supplementary Figure 4e-h), suggesting that Piezo1 may not directly contribute to f-actin remodelling. In line with alteration in myoblast fusion, excessive chemical activation of Piezo1 showed a significant decrease in f-actin in EDL (100  $\mu\text{M}$ ; 4-hour incubation) and SOL (100  $\mu\text{M}$ ; 30-min, 1- and 4-hour incubation) -derived myotubes (Supplementary Figure 4f and 4h). These findings suggest that deregulation of *Piezo1* expression and/or its activation status may impinge, likely indirectly, on cytoskeletal organisation during muscle differentiation.

## 4. Discussion

Our study reveals that the mechanosensitive ion channel Piezo1 is finely tuned during the myoblast fusion and formation of myotubes through four main findings. 1) *Piezo1* expression increases during myoblast differentiation in a muscle-type independent fashion. 2) *Piezo1* is essential for proper Calcium influx during muscle contraction. 3) Modulation of *Piezo1* expression alters both myoblast fusion and expression of the fusogens *Myomaker* and *Myomixer*. 3) Over-activation of Piezo1 disbalances myoblast fusion and myotube width.

### *Piezo1* in myogenesis

The current study investigated the effects of Piezo1 regulation throughout the myogenic program. *Piezo1* is expressed at a higher proportion in terminally differentiated myotubes, compared to proliferating myoblasts. Moreover, we found that, differentiating myocytes derived from the mainly slow-type muscle SOL displayed higher expression of *Piezo1* compared to the fast EDL muscle. Understanding the potential differences in muscle/fibre types and *Piezo1* regulation is an intriguing area for future research and could reflect differences in the dynamics of myogenic progression. We also confirmed that the expression of *Piezo2* is not altered by the down-regulation of *Piezo1*. This is perhaps not surprising given the fact that *Piezo2* is not as abundant in skeletal muscle compared to

*Piezo1* [5, 21]. Nevertheless, it was important to see any potential compensatory effects *Piezo2* may impose. Specific downregulation of *Piezo1* by siRNA-mediated transfection showed no significant change in the proliferation rate of either EDL- or SOL-derived myoblasts. However, our data do not exclude the possibility that *Piezo1* is not involved in earlier myogenic events, perhaps in balancing quiescence and activation of SCs. In proliferating myoblasts, reduction of *Piezo1* function does not alter onset of myoblast differentiation, evaluated by the proportion of Myogenin-positive cells. However, that is not to say that perhaps *Piezo1* does not alter other events important to myoblasts such as cell motility, which the current study did not include. In our current study, where a significant phenotype was observed was in terminally differentiated myotubes. Indeed, our data found that knockdown of *Piezo1* significantly reduced fusion of myocytes and prevented myotube formation and maturation. In contrast, activation of this  $\text{Ca}^{2+}$  permeable channel resulted in enhanced myoblast fusion.

#### *Piezo1 activation and $\text{Ca}^{2+}$ influx*

We show that selective downregulation of *Piezo1* dramatically suppressed  $[\text{Ca}^{2+}]_i$ , which most likely translates in the depression of the influx of  $\text{Ca}^{2+}$  into cultured myotubes exposed to stretch. In contrast, activation of *Piezo1* significantly increased  $[\text{Ca}^{2+}]_i$ , which means the enhancement of  $\text{Ca}^{2+}$  influx. Our results propose that *Piezo1* is a novel intracellular  $\text{Ca}^{2+}$  regulatory protein in skeletal muscle function.  $\text{Ca}^{2+}$  plays a crucial role in skeletal muscle function, maintenance and plasticity. All myofibres use  $\text{Ca}^{2+}$  as their main regulatory and signalling molecule [18-20]. Therefore, the contractile functionalities of myofibres are dependent on the highly regulated expression of proteins involved in  $\text{Ca}^{2+}$  handling and signalling. Our study showed that *Piezo1* mediated regulation of  $\text{Ca}^{2+}$  influx is a key driving factor in the respective decrease and increase in myoblast fusion in response to *Piezo1* inhibition and activation. To the best of our knowledge this is the first time this has been demonstrated.

The silicon bio-chamber experiments revealed that at relatively low stretch conditions of 3% (0.3 mm) neither EDL- nor SOL-derived myotubes elicited a significant increase in  $\text{Ca}^{2+}$  influx. However, at higher stretch distances (6% and 9% stretch) this mechanical barrier was crossed as demonstrated by the net increase in  $[\text{Ca}^{2+}]_i$ , compared to 0% stretch counterparts. In a similar set of experiments (albeit using urothelial cells), Miyamoto et al. also showed a distance dependent increase of  $\text{Ca}^{2+}$  influx. Interestingly this response was blunted in *Piezo1*-siRNA-treated conditions [21]. The researchers also showed that a high enough  $[\text{Ca}^{2+}]_i$  must be attained in order to elicit a response, in their case ATP efflux. Our data support the presence of a stretch-dependent increase in  $\text{Ca}^{2+}$  influx. Remarkably we found that activation of *Piezo1* resulted in increased  $[\text{Ca}^{2+}]_i$  at 3% stretch conditions, suggesting that the activation threshold of *Piezo1* was lowered. Furthermore, the data showed that reduction of *Piezo1* expression significantly blunted any significant increase of  $[\text{Ca}^{2+}]_i$  in response to stretch. These results, for the first time show the need for *Piezo1* to respond to stretch and permeate  $\text{Ca}^{2+}$  into myotubes. The findings also propose the presence of a physical threshold that must be attained before *Piezo1* mediated  $\text{Ca}^{2+}$  influx is significantly increased. Moreover, like Miyamoto et al [24], we find that a stretch-dependent increase in  $\text{Ca}^{2+}$  influx is suppressed when *Piezo1* expression is decreased. Conversely, we see an increase of  $[\text{Ca}^{2+}]_i$  when *Piezo1* is activated. Whether this leads to altered cellular/myotube viability in the form of ATP release remains a subject for future research.

#### *Piezo1 and muscular dystrophies*

*Piezo1* activation showed a significant increase in the fusion index of both EDL- and SOL-derived myotubes. Although this phenotype could be viewed as beneficial in terms of muscular dystrophy prevention, we must be aware of the potential dangers of an over-active *Piezo1* channel. In fact, we showed that even a 30 min incubation of myotubes with a high agonist concentration (100  $\mu\text{M}$  of Yoda1 treatment) led to decreased fusion in both

EDL- and SOL-derived myotubes (Supplementary Figure 2). This adverse phenotype is most likely the result of a dangerously high  $Ca^{2+}$  influx. Indeed, Since the early 1990's it has been postulated that defective mechanotransducers, also referred to stretch activated channels (SACs), contribute to the high influx of  $Ca^{2+}$ , and hence maintain higher  $Ca^{2+}$  resting levels in Duchenne's muscular dystrophy (DMD) [14, 25]. However, the identity of this channel(s) in DMD is yet to be identified. The current data makes the hypothesis that DMD stricken muscle may have malfunctioning Piezo1 channels which permeate  $Ca^{2+}$  at hazardously high levels. It is possible that the reduced fusion we observed from an over-active Piezo1 channel (Figure 4 and Supplementary Figure 2) stems from one of the many defects caused by over-accumulation of  $Ca^{2+}$ . It is imperative that future experiments characterise the expression of Piezo1 not only in DMD but other muscular dystrophies. This work is currently underway.

#### *Piezo1 and the myoblast fusion machinery*

*Piezo1* downregulation significantly reduced myoblast fusion during myotube formation and myotube maturation. To the best of our knowledge there is only one other paper published that examined *Piezo1* in skeletal muscle by Tsuchiya et al. [26]. Interestingly, the findings from this group showed that *Piezo1* inhibition resulted in a sheet-like syncytium of MyHC coupled with increased fusion. Although these findings show contrasting results to the ones presented in this study, we must take into consideration potential factors which may explain why this may be the case. One such factor is the method of *Piezo1* inhibition used by Tsuchiya et al, [26]. They carried out many of their experiments using knockout lines of *Piezo1* through the gene editing tool CRISPR/Cas9. The fact that these cell lines did not express *Piezo1* to begin with (unlike the cells we used) may yield completely different phenotypes, compared to the transient inhibition achieved by siRNA mediated transfection. Therefore, complete lack of *Piezo1* expression may favour the activation of a secondary, yet unknown, alternative *Piezo1*-affected pathway(s) to fusion as observed for other factors involved in fusion, such as Myogenin [27]. Regarding the *Piezo1* siRNA transfection experiments, although more than 60% reduction in gene expression is ideal; we nevertheless found that our level of *Piezo1* knockdown produced very interesting effects on myogenic regulation. Moreover, Miyamoto et al, [21] also obtained slightly below or just about 60% *Piezo1* reduction, yet reported intriguing *Piezo1*-associated events in urothelial cells. Perhaps Tsuchiya et al, obtained even greater knockdown of *Piezo1* in their siRNA-mediated analyses [26], further suggesting that the timing and level of *Piezo1* expression may yield varying phenotypes. There was also the likelihood that siRNA used in this study may potentially have off-target effects on other genes which could influence myotube formation by employing other mechanistic pathways. However, this likelihood is reduced by the fact that we have now tested five different *Piezo1*-specific siRNAs (including the one used by Tsuchiya et al. from the company Sigma) and all show reduced fusion (Supplementary Figure 5). Nevertheless, this study welcomes falsifiability. In fact, the siRNA used from Sigma, despite showing reduced fusion compared to controls, did show significantly greater fusion index compared to some of the siRNAs used from the company Qiagen. Furthermore, the knockdown efficiency measured by RT-qPCR showed that the Sigma-derived *Piezo1* siRNA was on average even more efficient compared to the main siRNA from Qiagen used in this study (Supplementary Figure 5f and 5g). Thus, our report highlights the potential phenotypic differences from fine tuning *Piezo1* downregulation levels. At the very least this report highlights the potential danger in using siRNAs solely from one provider and demands further high-quality testing from these companies to reduce potential off-target effects.

Additional support for the involvement of Piezo1 in myoblast fusion comes from our results which showed that its downregulation significantly reduced the expression of *Myomaker* - a muscle specific protein that localises to the plasma membrane and is crucial for vertebrate myoblast fusion [28-31]. Conversely Yoda1 specific activation of Piezo1 showed increased *Myomaker* expression (Supplementary Figure 6) indicating an interplay

between *Piezo1* and *Myomaker*. *Myomixer* on the other hand did not show significant changes in expression post downregulation nor activation of *Piezo1*. This potential decoupling of these fusogenic proteins is line with previous findings from Leikina et al [32]. Future studies should uncover whether the respective decrease and increase in *Myomaker* expression is a direct response from the downregulation/activation of *Piezo1* or an indirect event paralleling altered fusion pathway.

## 5. Conclusions

The data presented in this study showed that the *Piezo1* channel is present in SC-derived myoblasts and myotubes but expressed at a higher proportion in the latter. Downregulation of *Piezo1* significantly lowered the fusion capacity during myotube formation and maturation. In contrast, *Piezo1* activation increased fusion. Future research examining changes in myotube function (integrity,  $Ca^{2+}$  influx, cytoskeletal organisation and fusion) that are directly the result of mechanical stress should consider analysis of *Piezo1*. In the context of therapeutic strategies against muscular dystrophies such as DMD, not only must we unravel the spatiotemporal regulation of *Piezo1* expression, but we must be aware of this channel's ability to alter its  $Ca^{2+}$  influx threshold by adapting or inactivating its gating capacity in response to repetitive stimuli. Pharmaceutically, small activating molecules such as Yoda1 (and others like it) may prove beneficial. However careful attention must be given to the half-life and pharmacokinetics of these agonists in vivo before even considering them as viable drugs for human consumption. *Piezo1*'s importance in skeletal muscle maintenance and function will undoubtedly grow as new research aims to explore the mechanisms and signalling pathways this remarkable mechanosensor employs.

**Author Contributions:** K.G. designed and organized this study and performed data analysis as well as editing and review of manuscript. H.P.O.Q. wrote the manuscript, performed the experiments and performed data analysis. M.G. contributed to writing and editing manuscript and data analysis. S.Y. performed experiments. K.N. helped with experiments. T.Y. helped with experiments. D.R. helped with experiments. A.H. helped with experiments. O.H. helped with experiments. J.B. helped with experiments. A.A. helped with reviewing and editing of manuscript. Y.S. helped with reviewing and editing manuscript. M.T. provided experimental support and equipment and reviewed and edited manuscript. P.S.Z. provided advise, discussion support and reviewed and edited manuscript.

**Funding:** This work was supported by KAKENHI (JP17K01762, K.G.; JP18H03160, K.G.; JP19K22825, K.G.; 19KK0254, K.G.) from the Japan Society for the Promotion of Science, the Science Research Promotion Fund from the Promotion and Mutual Aid Corporation for Private Schools of Japan, and Graduate School of Health Sciences, Toyohashi SOZO University (K.G.).

**Institutional Review Board Statement:** All experimental procedures were carried out in accordance with the Guide for the Care and Use of Laboratory Animals as adopted and promulgated by the National Institutes of Health (Bethesda, MD, USA) and were approved by the Animal Use Committee of Toyohashi SOZO University A2018006, A2019006).

**Data Availability Statement:** All data is available upon request.

**Acknowledgments:** The authors thank Ms. Yumiko Asakura from the Department of Physiology, Graduate School of Health Sciences, Toyohashi SOZO University for her assistance.

**Conflicts of Interest:** The authors declare that there are no conflicts of interest.

## References

1. Mauro, A., *Satellite cell of skeletal muscle fibers*. J Biophys Biochem Cytol, 1961. **9**: p. 493-5. 1036
2. Zammit, P.S., et al., *Pax7 and myogenic progression in skeletal muscle satellite cells*. J Cell Sci, 2006. **119**(Pt 9): p. 1824-32. 1038
3. Zammit, P.S., T.A. Partridge, and Z. Yablonka-Reuveni, *The skeletal muscle satellite cell: the stem cell that came in from the cold*. J. Histochem. Cytochem., 2006. **54**: p. 1177-1191. 1039
4. Relaix, F. and P.S. Zammit, *Satellite cells are essential for skeletal muscle regeneration: the cell on the edge returns centre stage*. Development, 2012. **139**(16): p. 2845-56. 1041
5. Coste, B., et al., *Piezo1 and Piezo2 are essential components of distinct mechanically activated cation channels*. Science (New York, N.Y.), 2010. **330**(6000): p. 55-60. 1043
6. Wang, Y., et al., *A lever-like transduction pathway for long-distance chemical- and mechano-gating of the mechanosensitive Piezo1 channel*. Nature communications, 2018. **9**(1): p. 1300-1300. 1045
7. Cinar, E., et al., *Piezo1 regulates mechanotransductive release of ATP from human RBCs*. Proceedings of the National Academy of Sciences of the United States of America, 2015. **112**(38): p. 11783-11788. 1047
8. Ge, J., et al., *Architecture of the mammalian mechanosensitive Piezo1 channel*. Nature, 2015. **527**: p. 64. 1049
9. Sachs, F., *Stretch-activated ion channels: what are they?* Physiology (Bethesda, Md.), 2010. **25**(1): p. 50-56. 1050
10. Saotome, K., et al., *Structure of the mechanically activated ion channel Piezo1*. Nature, 2017. **554**: p. 481. 1051
11. Zhao, Q., et al., *The mechanosensitive Piezo1 channel: a three-bladed propeller-like structure and a lever-like mechanogating mechanism*. Febs j, 2018. 1052
12. Zhao, Q., et al., *Structure and mechanogating mechanism of the Piezo1 channel*. Nature, 2018. **554**: p. 487. 1054
13. Coste, B., et al., *Piezo1 ion channel pore properties are dictated by C-terminal region*. Nature Communications, 2015. **6**(1): p. 7223. 1055
14. Franco-Obregón, A. and J. Lansman, *Calcium entry through stretch-in-activated ion channels in MDX myotubes*. Nature, 1990. **344**: p. 670-3. 1057
15. Mercuri, E., C.G. Bönnemann, and F. Muntoni, *Muscular dystrophies*. Lancet, 2019. **394**(10213): p. 2025-2038. 1059
16. Collins, C.A. and P.S. Zammit, *Isolation and grafting of single muscle fibres*. Methods Mol Biol, 2009. **482**: p. 319-30. 1060
17. Lacroix, J.J., W.M. Botello-Smith, and Y. Luo, *Probing the gating mechanism of the mechanosensitive channel Piezo1 with the small molecule Yoda1*. Nature Communications, 2018. **9**(1): p. 2029. 1061
18. Berchtold, M.W., H. Brinkmeier, and M. Muntener, *Calcium ion in skeletal muscle: its crucial role for muscle function, plasticity, and disease*. Physiol Rev, 2000. **80**(3): p. 1215-65. 1063
19. Gehlert, S., W. Bloch, and F. Suhr, *Ca<sup>2+</sup>-dependent regulations and signaling in skeletal muscle: from electro-mechanical coupling to adaptation*. International journal of molecular sciences, 2015. **16**(1): p. 1066-1095. 1065
20. Allen, D.G., G.D. Lamb, and H. Westerblad, *Skeletal muscle fatigue: cellular mechanisms*. Physiol Rev, 2008. **88**(1): p. 287-332. 1067
21. Miyamoto, T., et al., *Functional role for Piezo1 in stretch-evoked Ca<sup>2+</sup>(+) influx and ATP release in urothelial cell cultures*. J Biol Chem, 2014. **289**(23): p. 16565-75. 1068
22. Nourse, J.L. and M.M. Pathak, *How cells channel their stress: Interplay between Piezo1 and the cytoskeleton*. Semin Cell Dev Biol, 2017. **71**: p. 3-12. 1070
23. McHugh, B.J., et al., *Loss of the integrin-activating transmembrane protein Fam38A (Piezo1) promotes a switch to a reduced integrin-dependent mode of cell migration*. PloS one, 2012. **7**(7): p. e40346-e40346. 1072
24. Miyamoto, T., et al., *Functional Role for Piezo1 in Stretch-evoked Ca<sup>2+</sup> Influx and ATP Release in Urothelial Cell Cultures*. The Journal of biological chemistry, 2014. **289**. 1074
25. Franco-Obregon, A., Jr. and J.B. Lansman, *Mechanosensitive ion channels in skeletal muscle from normal and dystrophic mice*. J Physiol, 1994. **481 ( Pt 2)**: p. 299-309. 1076

- 
26. Tsuchiya, M., et al., *Cell surface flip-flop of phosphatidylserine is critical for PIEZO1-mediated myotube formation*. Nature Communications, 2018. **9**(1): p. 2049. 1078  
1079
  27. Ganassi, M., et al., *Myogenin promotes myocyte fusion to balance fibre number and size*. Nature Communications, 2018. **9**(1): p. 4232. 1080  
1081
  28. Millay, D.P., et al., *Myomaker is a membrane activator of myoblast fusion and muscle formation*. Nature, 2013. **499**(7458): p. 301-5. 1082
  29. Ganassi, M. and S. Badodi, *Myogenin promotes myocyte fusion to balance fibre number and size*. 2018. **9**(1): p. 4232. 1083
  30. Shi, J., et al., *Knockout of myomaker results in defective myoblast fusion, reduced muscle growth and increased adipocyte infiltration in zebrafish skeletal muscle*. Human Molecular Genetics, 2018. **27**(20): p. 3542-3554. 1084  
1085
  31. Goh, Q. and D.P. Millay, *Requirement of myomaker-mediated stem cell fusion for skeletal muscle hypertrophy*. 2017. **6**. 1086
  32. Leikina, E., et al., *Myomaker and Myomerger Work Independently to Control Distinct Steps of Membrane Remodeling during Myoblast Fusion*. Dev Cell, 2018. **46**(6): p. 767-780.e7. 1087  
1088  
1089  
1090  
1091  
1092  
1093  
1094  
1095  
1096  
1097  
1098  
1099  
1100  
1101  
1102  
1103  
1104  
1105  
1106  
1107  
1108  
1109  
1110  
1111  
1112  
1113  
1114  
1115  
1116  
1117  
1118  
1119  
1120  
1121  
1122  
1123  
1124  
1125  
1126  
1127  
1128  
1129  
1130  
1131

---

|                                                                                                                                                                                                    |                                                                                                                                                                                                              |
|----------------------------------------------------------------------------------------------------------------------------------------------------------------------------------------------------|--------------------------------------------------------------------------------------------------------------------------------------------------------------------------------------------------------------|
| <b>List of Supplementary Material</b>                                                                                                                                                              | 1132                                                                                                                                                                                                         |
| <b>Supplementary figure 1.</b> <i>Piezo1</i> is expressed in SC-derived myoblasts throughout myoblast differentiation. <i>Piezo1</i> downregulation does not alter the expression of <i>Piezo2</i> | 1133<br>1134<br>1135                                                                                                                                                                                         |
| <b>Supplementary figure 2.</b> <i>Piezo1</i> activation increases myogenic fusion                                                                                                                  | 1136<br>1137<br>1138                                                                                                                                                                                         |
| <b>Supplementary figure 3.</b> Yoda1-mediated activation of <i>Piezo1</i> decreases myotube width                                                                                                  | 1139<br>1140                                                                                                                                                                                                 |
| <b>Supplementary figure 4.</b> <i>Piezo1</i> knockdown reduced f-actin intensity in EDL- and SOL-derived myotubes                                                                                  | 1141<br>1142                                                                                                                                                                                                 |
| <b>Supplementary figure 5.</b> Different <i>Piezo1</i> siRNA targets continue to show decrease in myoblast fusion                                                                                  | 1143<br>1144                                                                                                                                                                                                 |
| <b>Supplementary figure 6.</b> <i>Myomaker</i> is upregulated in response to <i>Piezo1</i> activation                                                                                              | 1145<br>1146<br>1147<br>1148<br>1149<br>1150<br>1151<br>1152<br>1153<br>1154<br>1155<br>1156<br>1157<br>1158<br>1159<br>1160<br>1161<br>1162<br>1163<br>1164<br>1165<br>1166<br>1167<br>1168<br>1169<br>1170 |

Supplementary Figure 1 - *Piezo1* is expressed in SC-derived myoblasts throughout myoblast differentiation. *Piezo1* downregulation does not alter the expression of *Piezo2*

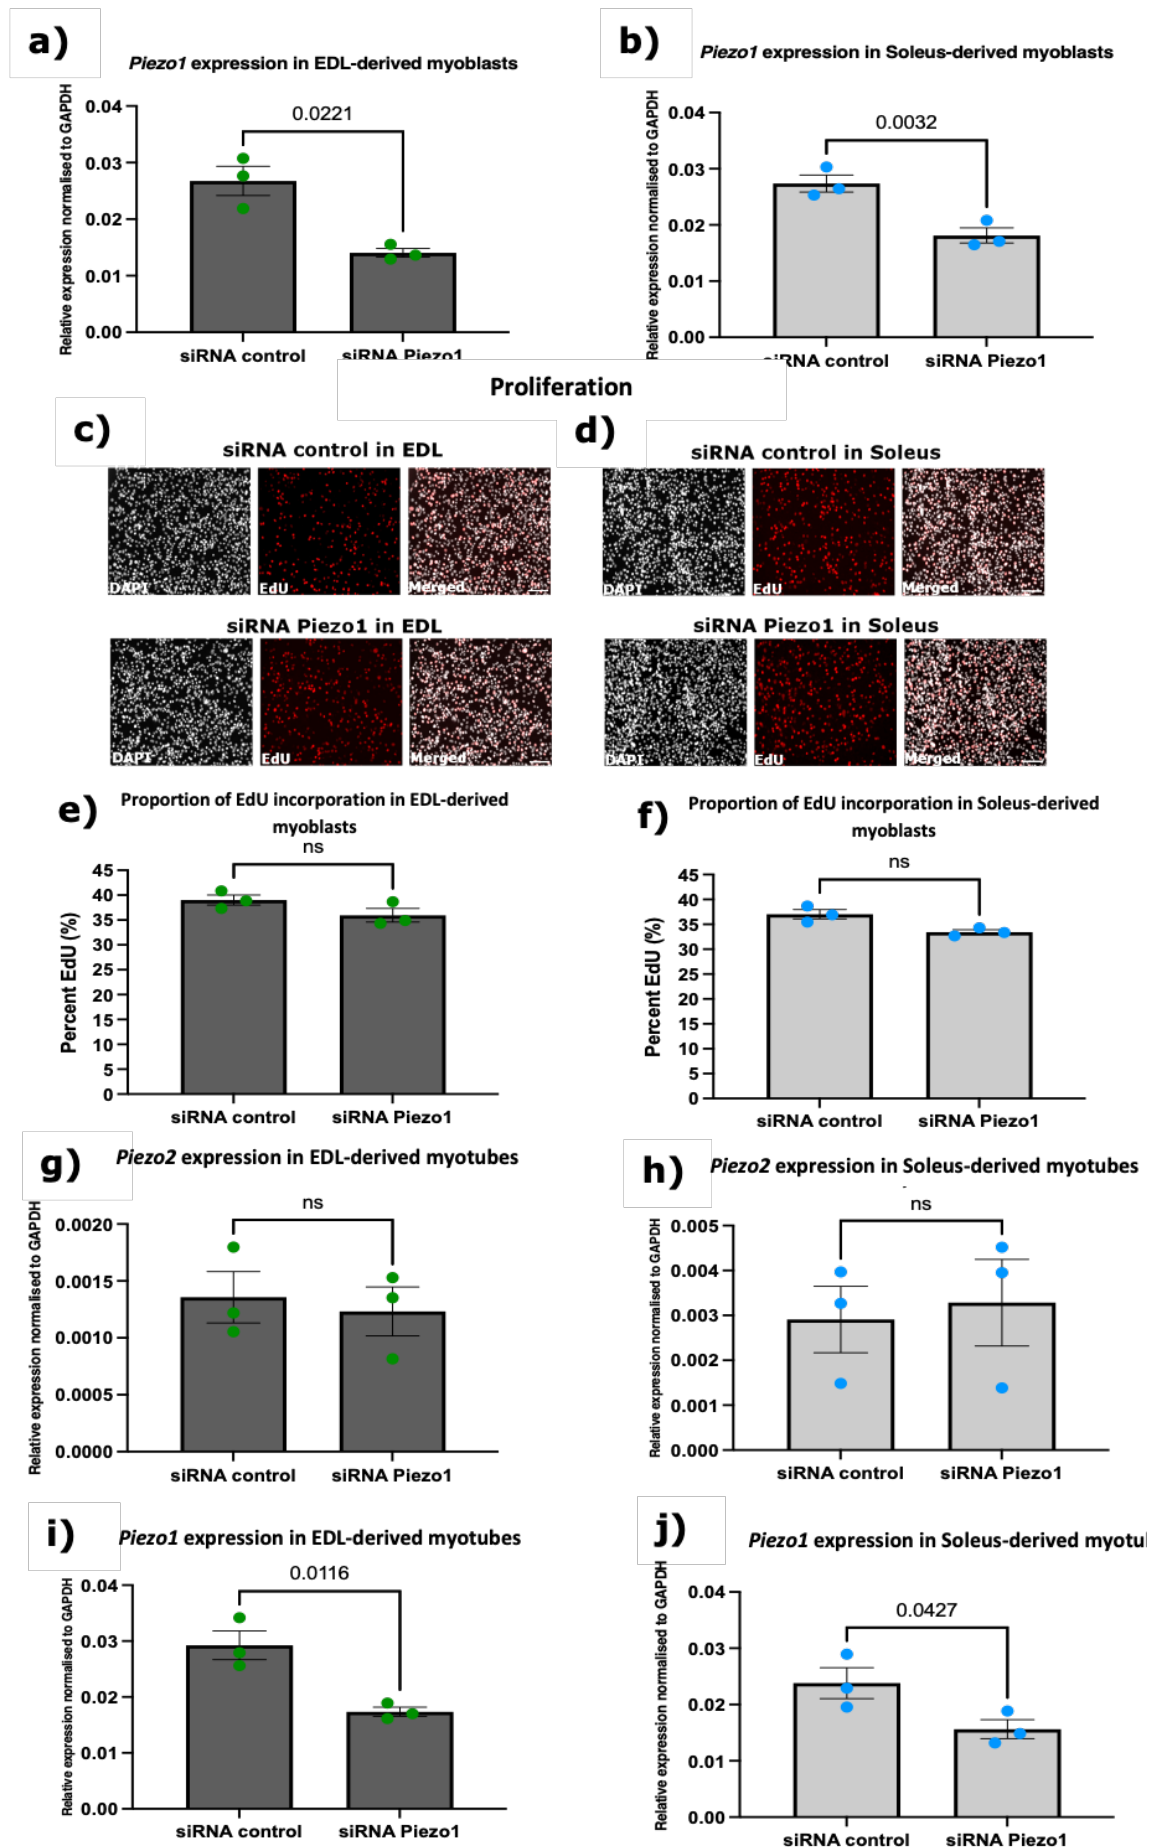

1171  
1172  
1173  
1174  
1175  
1176  
1177  
1178  
1179  
1180  
1181  
1182  
1183  
1184  
1185  
1186  
1187  
1188  
1189  
1190  
1191  
1192  
1193  
1194  
1195  
1196  
1197  
1198  
1199  
1200  
1201  
1202  
1203  
1204  
1205  
1206  
1207  
1208  
1209  
1210



**Supplementary figure 1. *Piezo1* is expressed in SC-derived myoblasts throughout myoblast differentiation. *Piezo1* downregulation does not alter the expression of *Piezo2*.** (a) and (b) Relative fold changes in expression of *Piezo1* in murine EDL- (dark grey bars, green dots) and SOL-derived myoblasts (light grey bars, blue dots). myoblasts were transfected with 10 nM of either control-siRNA or targeting siRNA against *Piezo1* (*Piezo1*-siRNA). After overnight incubation, cells were incubated for a further 24 hours and expression of *Piezo1* was measured. (c) and (d) Representative images of EDL and soleus primary-derived myoblasts, transfected with 10nM of siRNA control or siRNA-*Piezo1*. Following overnight incubation, the medium was changed with fresh proliferation medium and cells were incubated for a further 24 hours, and then subjected to a 2-hour pulse with EdU (red panels). DAPI counterstained nuclei shown in black and white panels. Scale bar is 100  $\mu$ m. (e) and (f) Proportion of EdU-incorporated cells relative to total (DAPI) cell count. (g-j) Relative fold changes in expression of *Piezo2* (g and h) and *Piezo1* (i and j) in EDL- and soleus-derived **myotubes**. Following an initial differentiation period (24 hours at high confluency), cells were transfected with 10 nM of either control-siRNA (siRNA control) or *Piezo1*-siRNA. After overnight incubation, cells were incubated for a further 24 hours. Values were normalised to *Gapdh*. Data is presented as mean  $\pm$  SEM from three experiments (n = 3 mice). p values are annotated above graphs showing significance (or ns, not significant) compared to control conditions using a 2-tailed paired student t-test.

1211  
1212  
1213  
1214  
1215  
1216  
1217  
1218  
1219  
1220  
1221  
1222  
1223  
1224  
1225  
1226  
  
1227  
  
1228  
  
1229  
  
1230  
  
1231  
  
1232  
  
1233  
  
1234  
  
1235  
  
1236  
  
1237  
  
1238  
  
1239  
  
1240  
  
1241  
  
1242  
  
1243  
  
1244  
  
1245

Supplementary Figure 2 - Piezo1 activation increases myogenic fusion

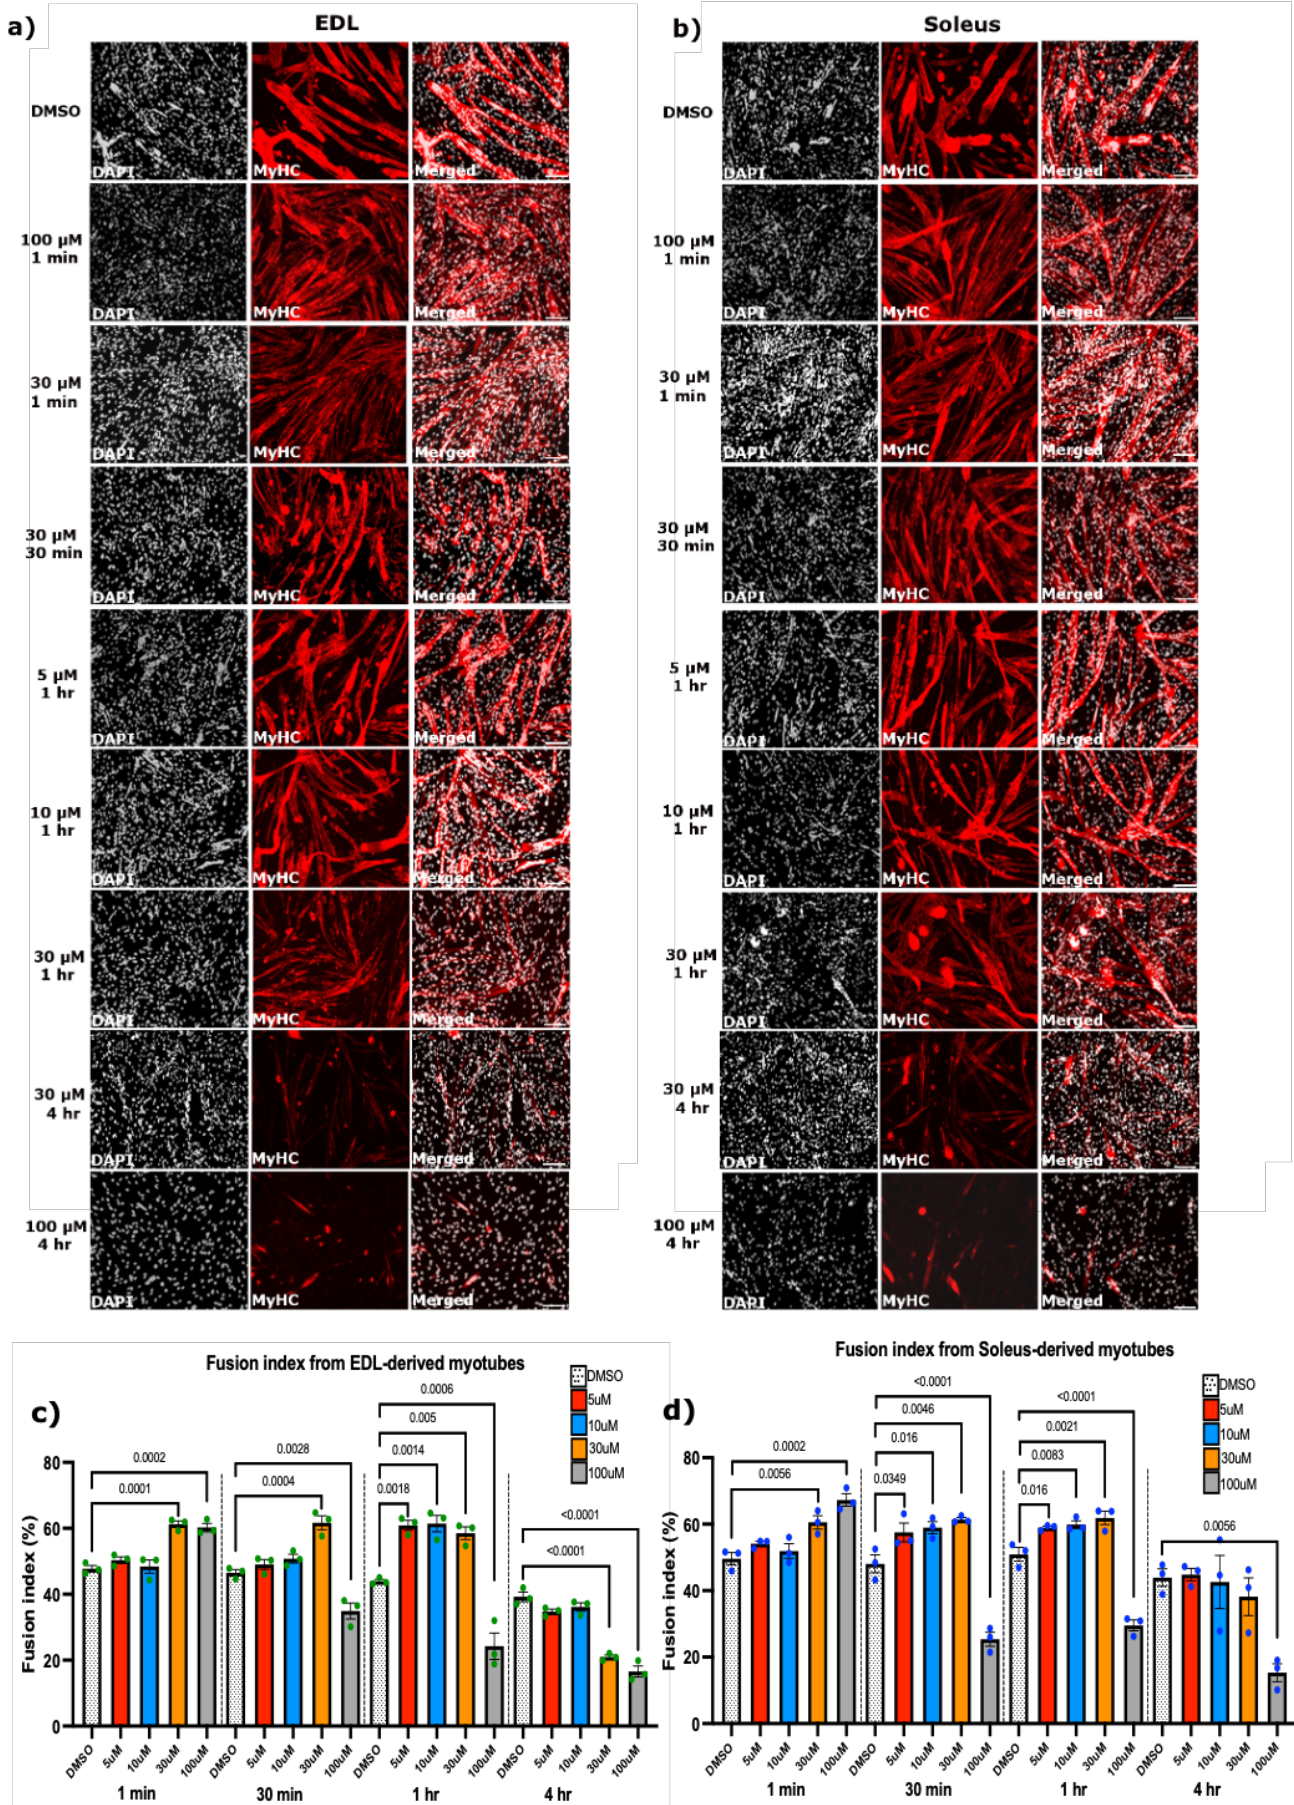

1246

1247

1248

1249

1250

1251

1252

1253

1254

1255

1256

1257

1258

1259

1260

1261

1262

1263

1264

1265

1266

1267

1268

1269

1270

1271

1272

**Supplementary Figure 2. Piezo1 activation increases myogenic fusion.** Early forming myotubes were administered with either DMSO (control, white dotted bars) or the Piezo1-agonist Yoda1 at the following concentration: 5  $\mu$ M (red bars), 10  $\mu$ M (blue bars), 30  $\mu$ M (orange bars) and 100  $\mu$ M (grey bars). Myotubes were incubated for 1 min, 30 min, 1 hour and 4 hours. Following the incubation period, the medium was exchanged with fresh reduced medium (without agonist) and myotubes were incubated for a further 2 days. **(a)** and **(b)** Representative images of cohorts at relevant timepoints and concentrations, immunostained for Myosin heavy (MyHC) (red panels) and counterstained with DAPI (black and white panels). Micrographs taken at x20 magnification. Scale bar is 100  $\mu$ m. Bar graphs display fusion index in **(c)** EDL and **(d)** soleus-derived myotubes from each time point and concentration variables. Values are mean  $\pm$  SEM. p values are annotated above graphs showing significance compared to DMSO controls using one-way ANOVA tests followed by the Tukey-Kramer post-hoc. n = 3 mice.

1273  
1274  
1275  
1276  
1277  
1278  
1279  
1280  
1281  
1282  
1283  
  
1284  
  
1285  
  
1286  
  
1287  
  
1288  
  
1289  
  
1290  
  
1291  
  
1292  
  
1293  
  
1294  
  
1295  
  
1296  
  
1297  
  
1298  
  
1299  
  
1300  
  
1301  
  
1302  
  
1303  
  
1304  
  
1305

Supplementary Figure 3 - Yoda1-mediated activation of Piezo1 decreases myotube width 1306

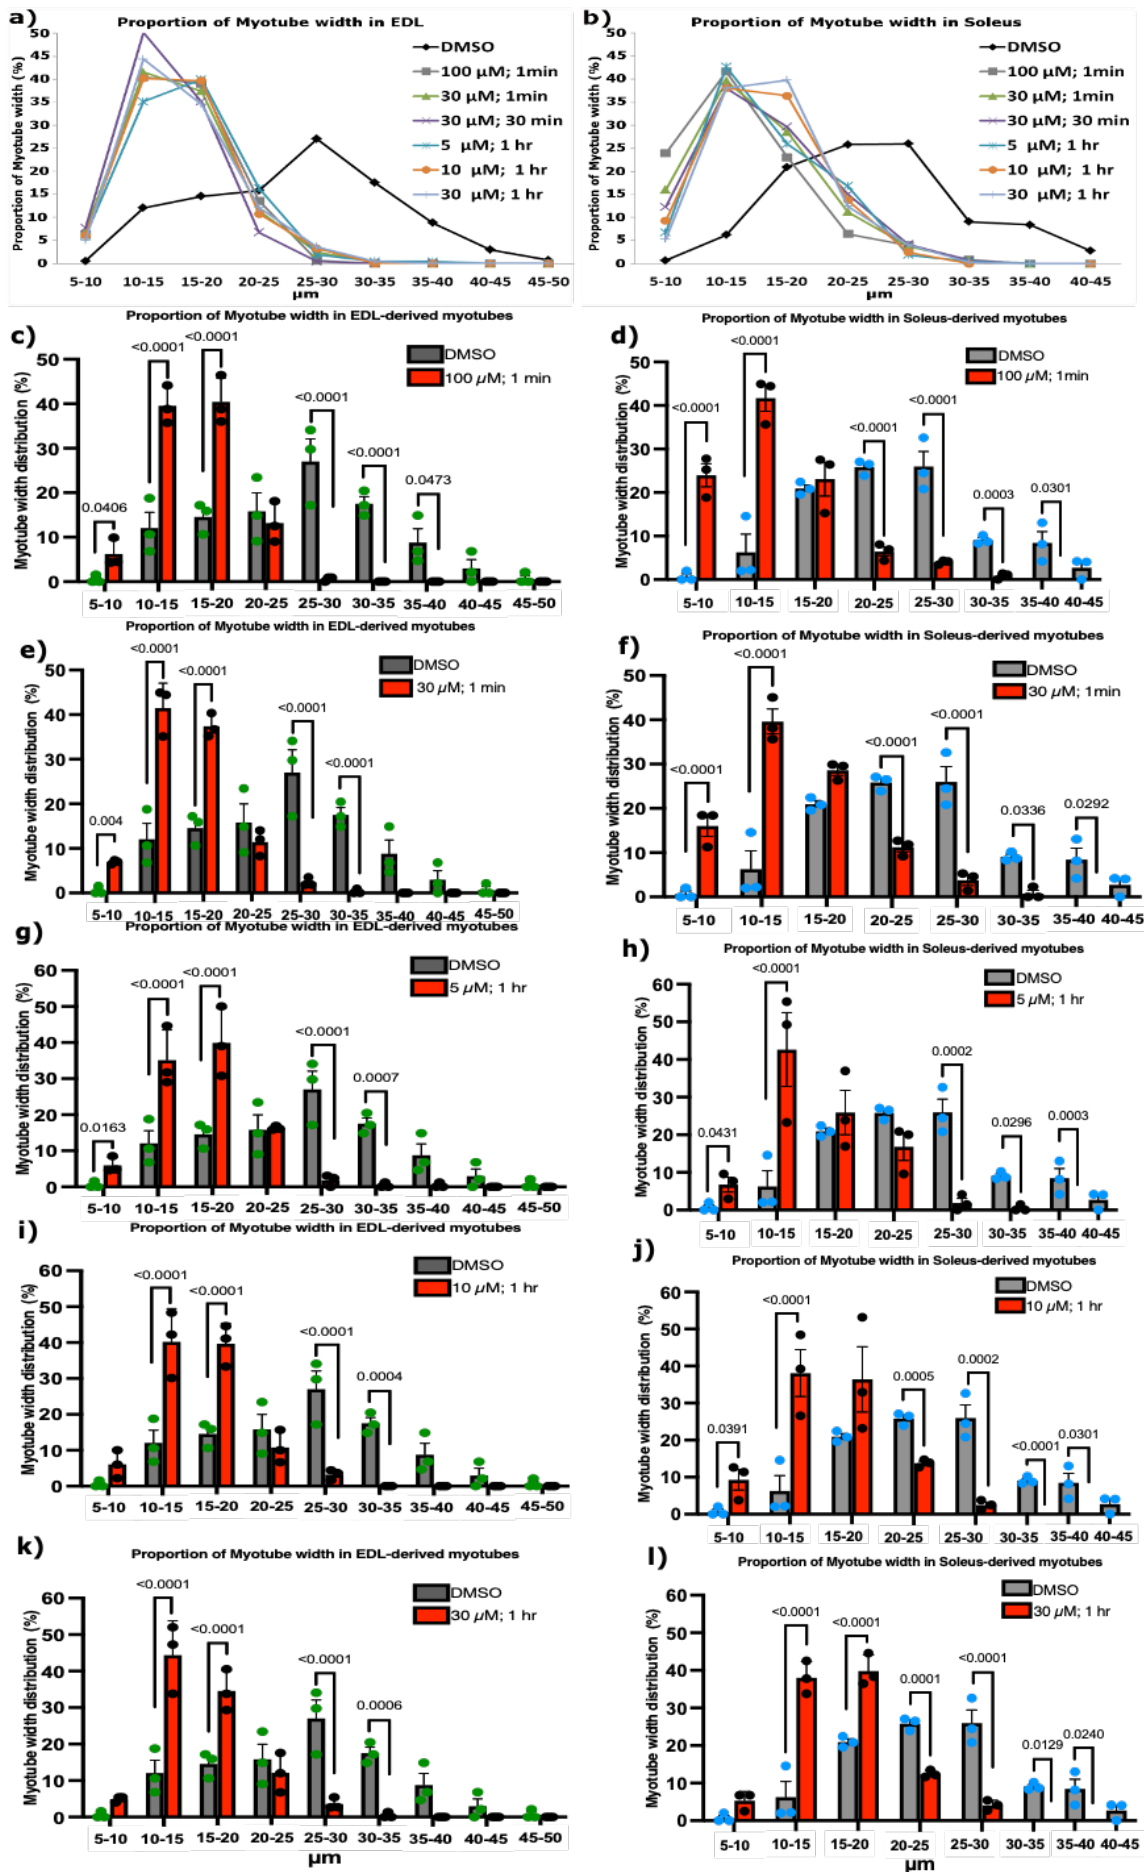

**Supplementary Figure 3. Yoda1-mediated activation of Piezo1 decreases myotube width.** Myotube width was divided into incremental bins of 5  $\mu\text{m}$  and represented as percentages relative to the total number of myotubes counted. The overall proportion of myotube width distribution in DMSO controls and Yoda1-treated samples is summarised as line graphs in (a) EDL and (b) soleus-derived myotubes. (c-1) Bar graphs comparing DMSO controls and samples which showed increased fusion post Yoda1 treatment (red bars) in EDL (left, dark grey bars green points) and soleus (right, light grey blue points)-derived myotubes. Data is mean  $\pm$  SEM from three experiments (n = 3 mice). p values are annotated above graphs showing significance compared to DMSO control conditions at each size bin using 2-tailed unpaired student t-test. one-way ANOVA followed by the Tukey-Kramer post-hoc. Please refer to Figure 6 (a) and (c) for representative images.

1337  
1338  
1339  
1340  
1341  
1342  
1343  
1344  
  
1345  
1346  
1347  
1348  
1349  
1350  
1351  
1352  
1353  
1354  
1355  
1356  
1357  
1358  
1359  
1360  
1361  
1362  
1363  
1364  
1365  
1366  
1367  
1368  
1369  
1370  
1371  
1372  
1373  
1374  
1375  
1376  
1377  
1378  
1379  
1380

Supplementary Figure 4 - *Piezo1* knockdown reduced f-actin intensity in EDL- and SOL-derived myotubes

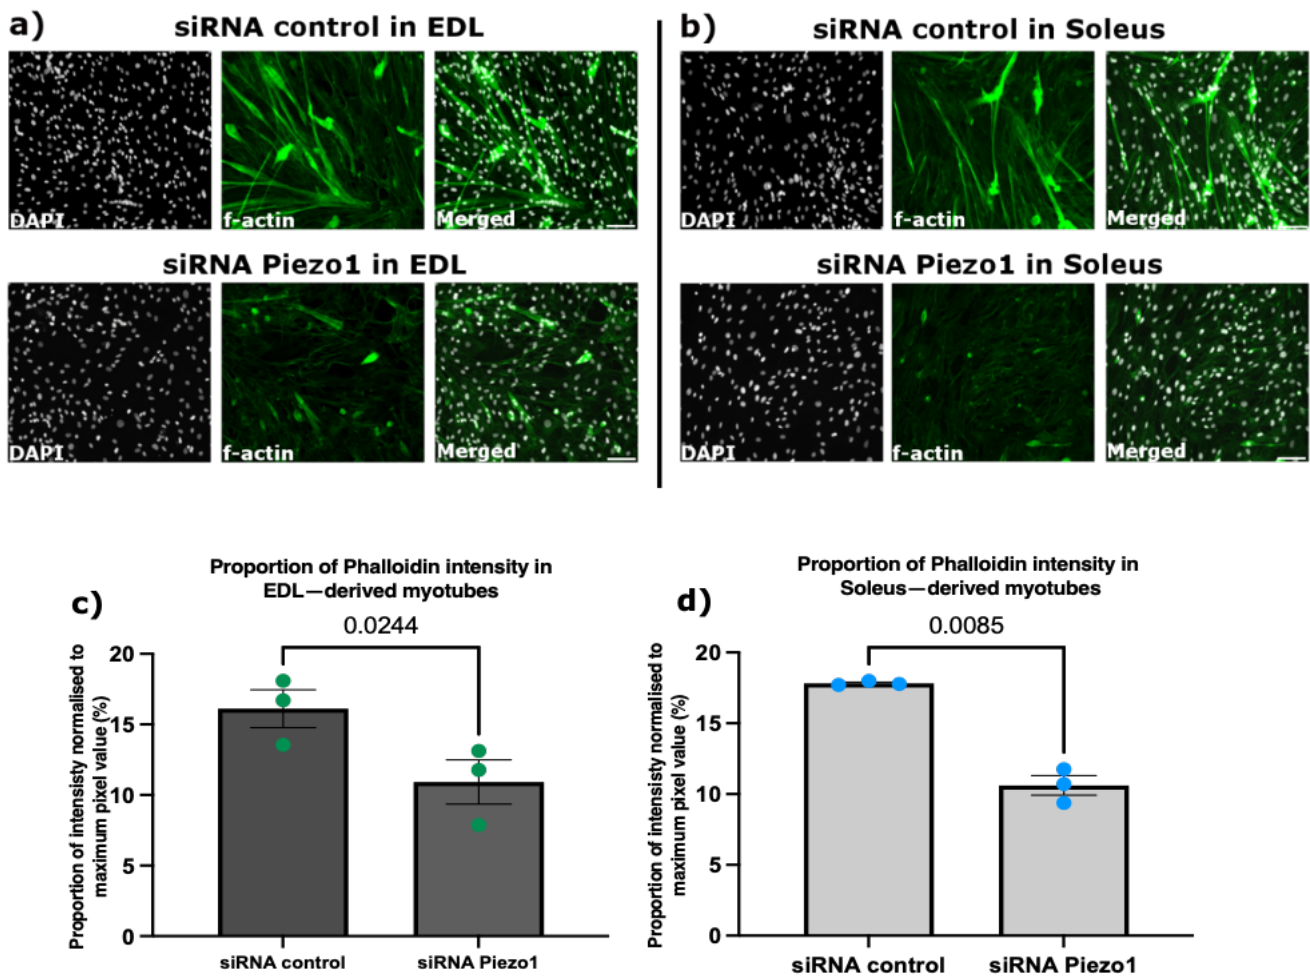

1381  
1382  
1383  
1384  
1385  
1386  
1387  
1388  
1389  
1390  
1391  
1392  
1393  
1394  
1395  
1396  
1397  
1398  
1399  
1400  
1401  
1402  
1403  
1404  
1405  
1406  
1407  
1408  
1409  
1410  
1411  
1412  
1413  
1414  
1415  
1416  
1417  
1418  
1419  
1420  
1421  
1422

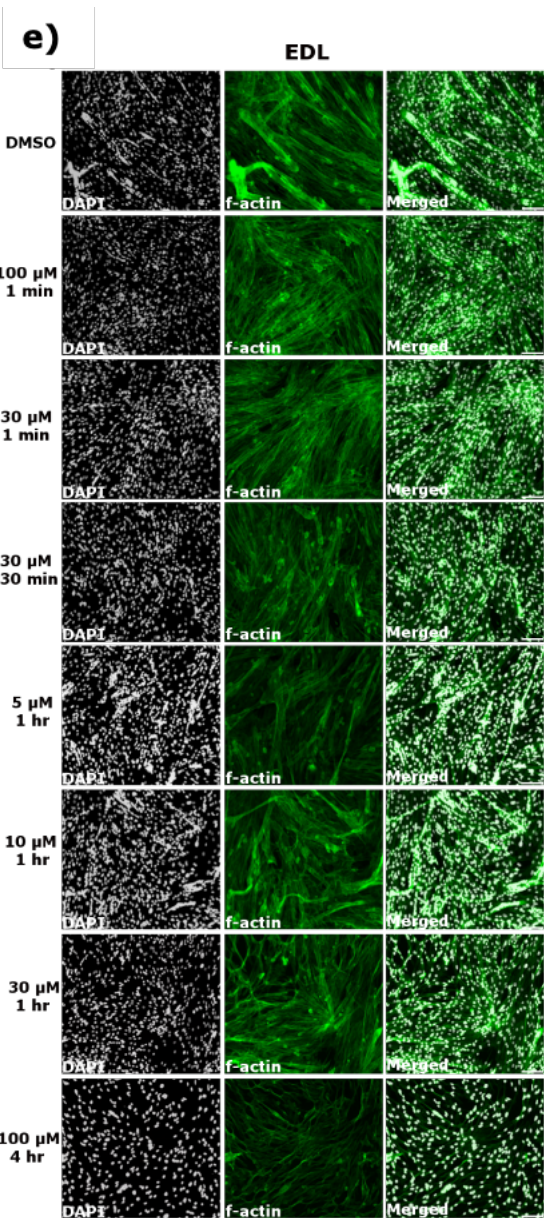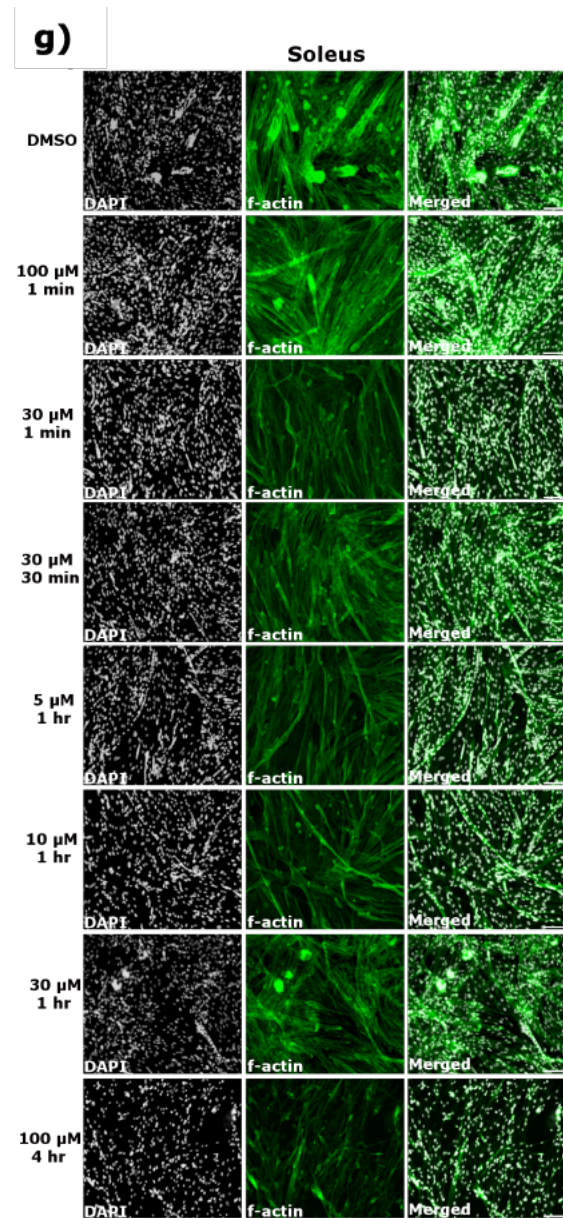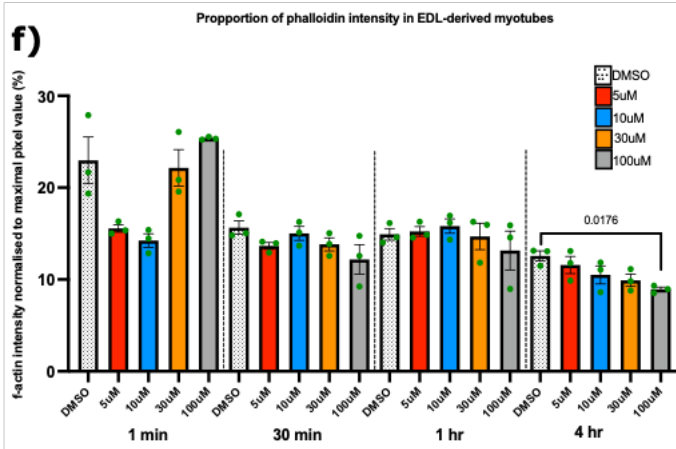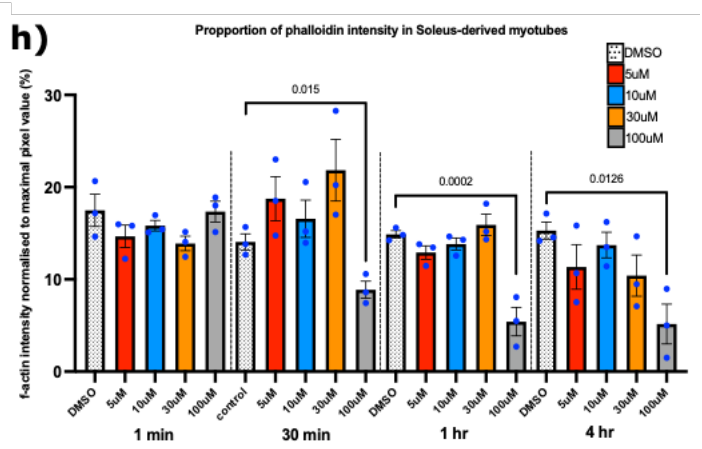

1423  
1424  
1425  
1426  
1427  
1428  
1429  
1430  
1431  
1432  
1433  
1434  
1435  
1436  
1437  
1438  
1439  
1440  
1441  
1442  
1443  
1444  
1445  
1446  
1447  
1448  
1449  
1450  
1451  
1452  
1453  
1454  
1455  
1456  
1457  
1458  
1459  
1460  
1461  
1462  
1463  
1464

**Supplementary Figure 4. *Piezo1* knockdown reduced f-actin intensity in EDL and SOL-derived myotubes.**

(a) and (b) Representative images of EDL and soleus muscle-derived myotubes. Early forming myotubes were transfected with 10nM of control-siRNA (siRNA control) or *Piezo1*-siRNA (siRNA *Piezo1*). Following overnight incubation, cells were incubated for a further 72 hours. The cytoskeleton protein f-actin was visualised using fluorescently labelled phalloidin (green panels). Nuclei were counterstained with DAPI (black and white panels). (c) and (d) Overall fluorescence intensity measured by pixel/area in each field of view (six images per conditions) and expressed as percentages relative to the maximum pixel value. Data is mean  $\pm$  SEM from three experiments (n = 3 mice). p values are annotated above graphs compared to siRNA control conditions using a 2-tailed paired student t-test. (e-h) Early forming myotubes were administered with either DMSO (control, white dotted bars) or Yoda1 at the following concentration: 5  $\mu$ M (red bars), 10  $\mu$ M (blue bars), 30  $\mu$ M (orange bars) and 100  $\mu$ M (grey bars). Myotubes were incubated for 1 min, 30 min, 1 hour and 4 hours. Following incubation period, the medium was exchanged with fresh reduced medium (without agonist) and myotubes were cultured for a further 2 days. (e) and (g) Representative images at relevant timepoints and concentrations treated with fluorescently labelled phalloidin (green panels) and counterstained with DAPI (black and white panels). Images taken at x20 magnification. Scale bar is 100  $\mu$ m. Bar graphs display proportion of f-actin intensity in (f) EDL and (h) soleus derived myotubes from each time point and concentration variables. Values are mean  $\pm$  SEM. p values are annotated above graphs showing significance compared to DMSO control conditions using one-way ANOVA tests followed by the Tukey-Kramer post-hoc. n = 3 mice.

1465  
1466  
1467  
1468  
1469  
1470  
1471  
1472  
1473  
1474  
1475  
1476  
1477  
1478  
1479  
1480  
1481  
1482  
  
1483  
1484  
1485  
1486  
1487  
1488  
1489  
1490  
1491  
1492  
1493  
1494  
1495  
1496  
1497  
1498  
1499  
1500  
1501  
1502  
1503  
1504  
1505  
1506  
1507  
1508  
1509



Supplementary Figure 5 - Different *Piezo1* siRNA targets continue to show decrease in myoblast fusion

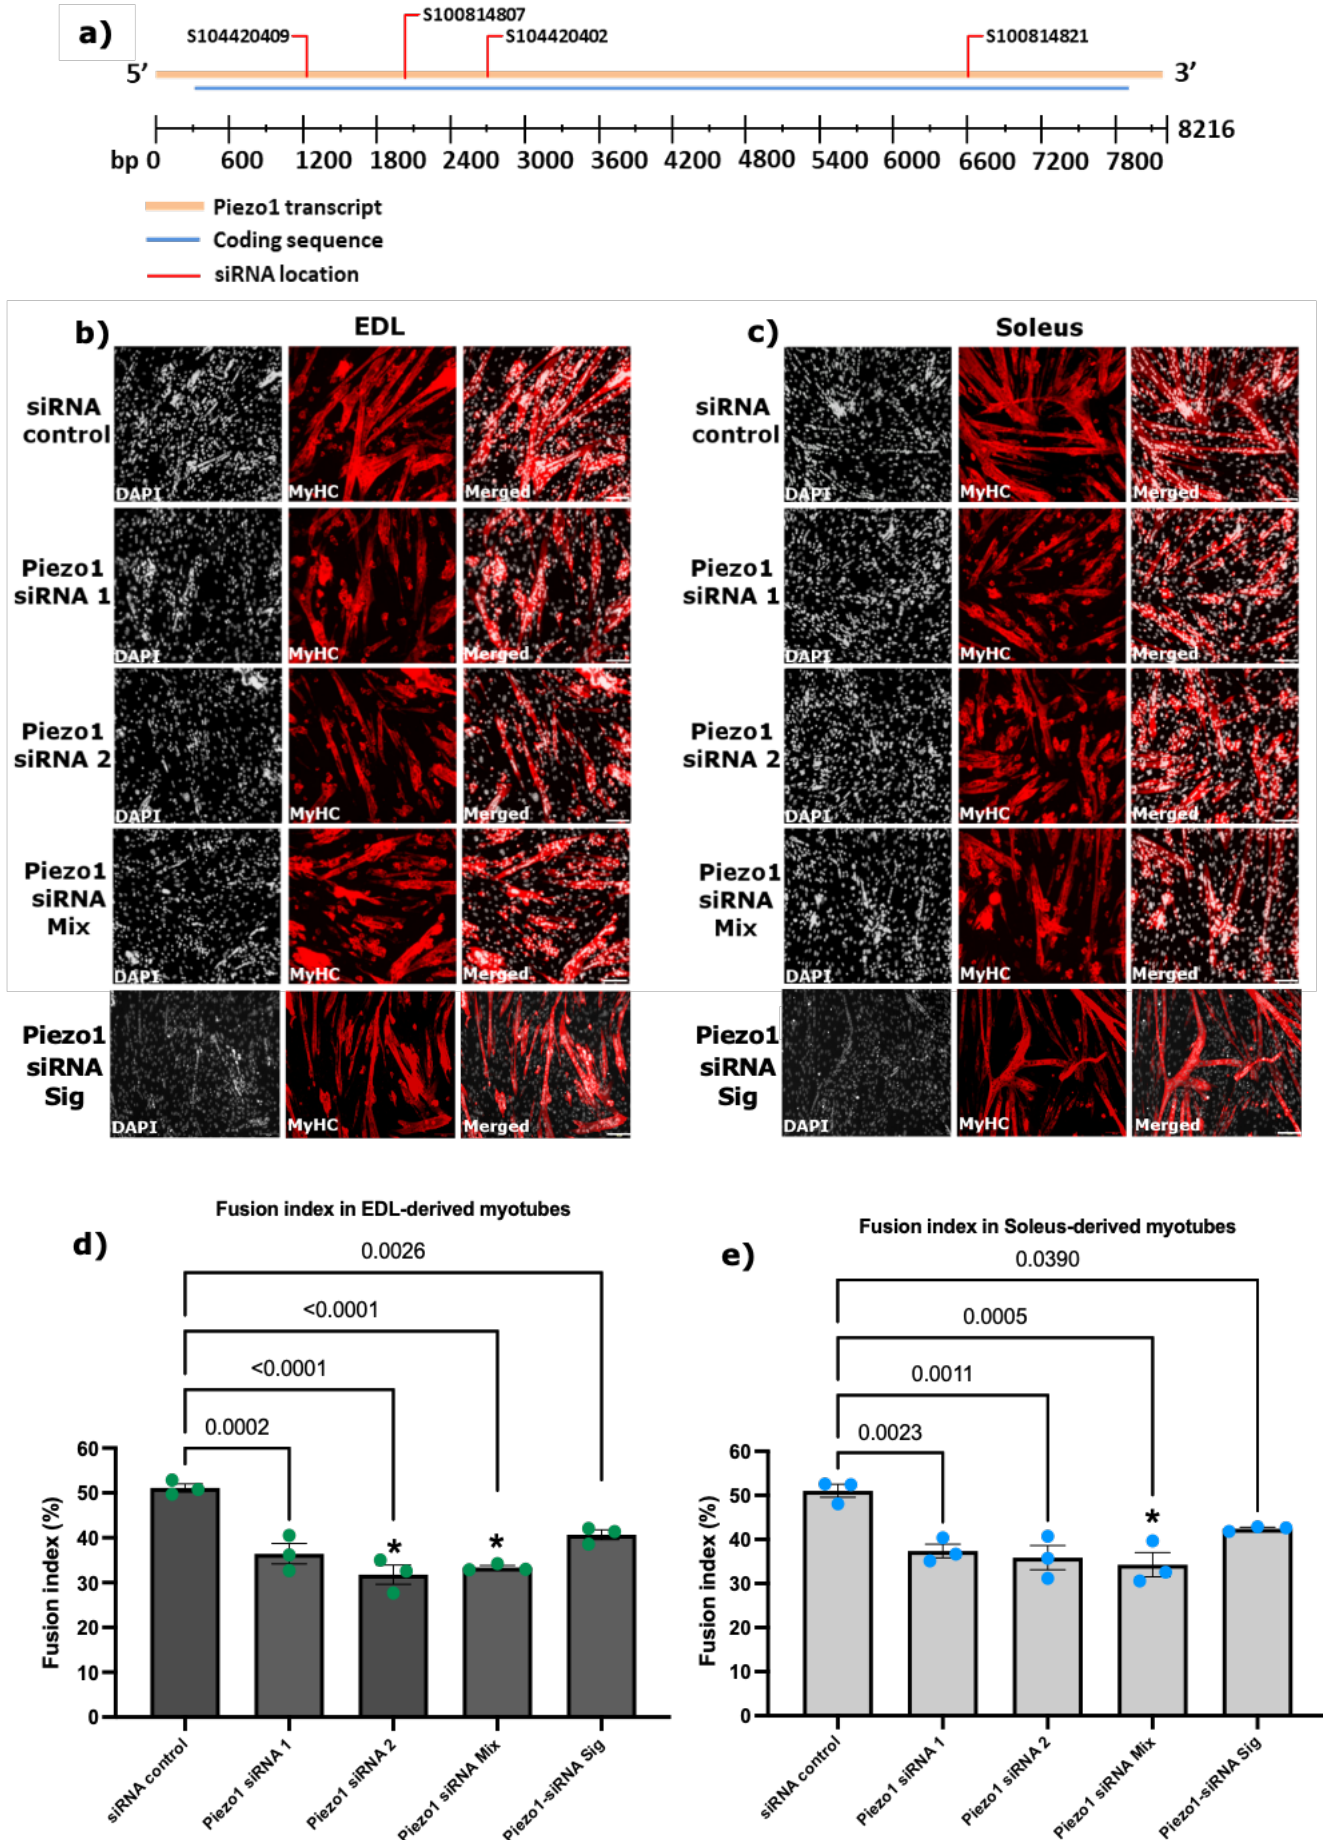

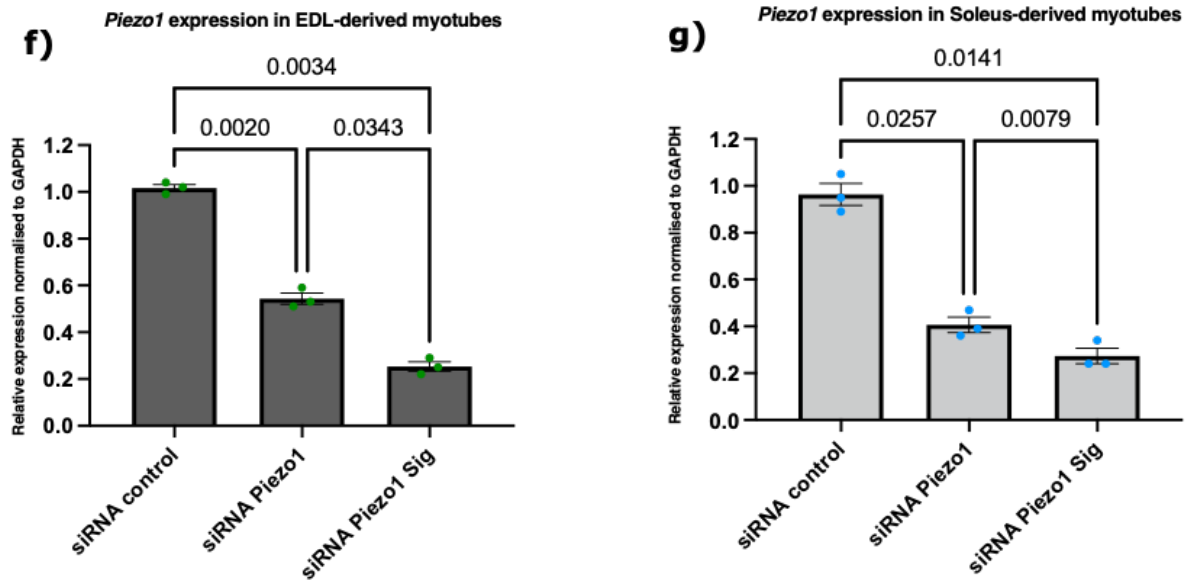

**Supplementary figure 5. Different *Piezo1* siRNA targets continue to show decrease in myoblast fusion.**

(a) Location of siRNAs shown in Table 1 on *Piezo1* mRNA. Diagram shows *Piezo1* mRNA transcript (orange bar), coding sequence (blue bar) and location of each siRNA (red line). bp: base pair. Diagram is adapted from Qiagen (<https://geneglobe.qiagen.com/product-groups/flexitube-sirna>). (b) and (c) Representative images of EDL and soleus muscle-derived myotubes, transfected with 10nM of control-siRNA or different siRNAs specific for *Piezo1* (*Piezo1*-siRNA 1, *Piezo1*-siRNA 2 and *Piezo1*-siRNA Sig). A mixture of four different *Piezo1*-siRNAs from Qiagen (*Piezo1*-siRNA Mix) including the one in the main text (Table 2) was also used at 10 nM (2.5 nm each). Myoblasts were transfected and incubated overnight; cells were incubated for a further 72 hours in differentiation medium. Cells were immunolabelled for Myosin heavy chain (MyHC) (red panels) and counterstained with DAPI (black and white panels). (d) and (e) The fusion index was calculated by counting the total number of nuclei within each myotube (more than two nuclei per myotube) and representing this as a percentage relative to the total number nuclei in the image taken. (e) and (f) Relative expression of *Piezo1* in (e) EDL and (f) Soleus derived myotubes transfected with 10nM of siRNA control or siRNA *Piezo1* (Qiagen, S104420409) or siRNA *Piezo1* Sig. Data is mean  $\pm$  SEM from three experiments ( $n = 3$  mice). p values are annotated above graphs showing significance compared to siRNA-control conditions using one-way ANOVA followed by the Tukey-Kramer post-hoc. An asterisk (\*) denotes significance at  $p < 0.05$  compared to *Piezo1*-siRNA Sig. From table 2, *Piezo1* siRNA 1 corresponds to Qiagen, S104420402. *Piezo1* siRNA 2 corresponds to Qiagen, S100814807. *Piezo1* siRNA Sig corresponds to Sigma: SASI\_Mm01\_00281158

Supplementary Figure 6 - *Myomaker* is upregulated in response to Piezo1 activation

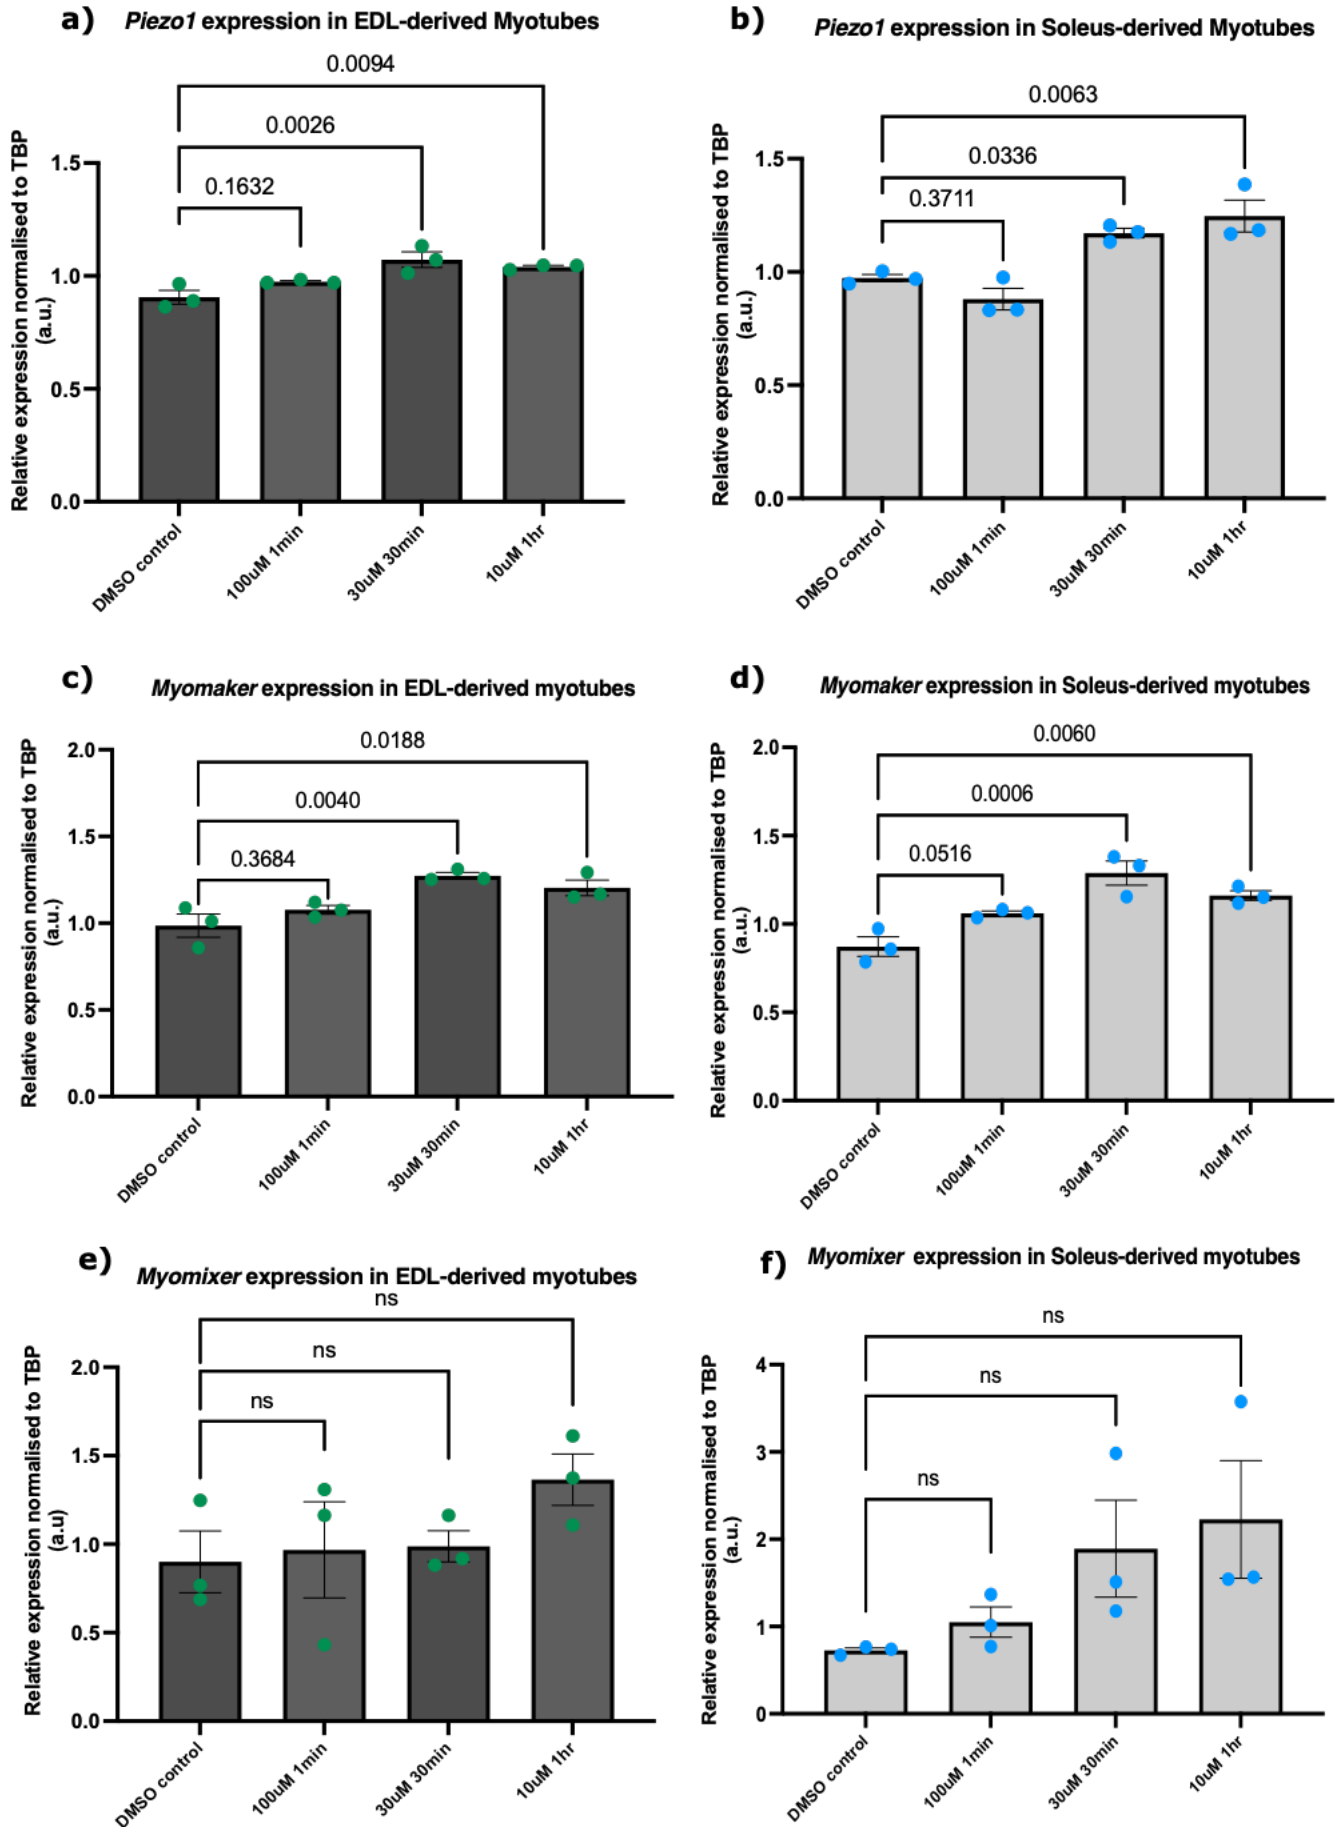

1598  
1599  
1600  
1601  
1602  
1603  
1604  
1605  
1606  
1607  
1608  
1609  
1610  
1611  
1612  
1613  
1614  
1615  
1616  
1617  
1618  
1619  
1620  
1621  
1622  
1623  
1624  
1625  
1626  
1627  
1628  
1629  
1630  
1631  
1632  
1633  
1634  
1635  
1636  
1637  
1638

**Supplementary figure 6. *Myomaker* is upregulated in response to *Piezo1* activation.** Early forming myotubes were subjected to either DMSO or Yoda1 at 100  $\mu$ M, 30  $\mu$ M and 10  $\mu$ M for 1 min, 30 min and 1 hr respectively. Following incubation, medium was exchanged and myotubes were cultured for a further 2 days. Cells were then collected and RT-qPCRs were performed. (a) and (b) *Piezo1* expression showed significant increase at 30  $\mu$ M; 30 min and 10  $\mu$ M; 1 hr in EDL- and soleus-derived myotubes. Similarly, both (c) EDL- and (d) soleus-derived myotubes showed increased *Myomaker* expression compared DMSO controls. *Myomixer* on the other hand showed no statistically significant change in expression in (e) EDL- or (f) soleus-derived myotubes. p values are annotated above graphs showing significance (or ns, not significant) compared to DMSO-control conditions using one-way ANOVA followed by the Tukey-Kramer post-hoc. n = 3 mice.

1639  
1640  
1641  
1642  
1643  
1644  
1645  
1646  
  
1647  
1648  
1649  
1650  
1651  
1652  
1653  
1654  
1655  
1656  
1657  
1658  
1659  
1660  
1661  
1662  
1663  
1664  
1665  
1666  
1667  
1668  
1669  
1670  
1671  
1672  
1673  
1674  
1675  
1676  
1677  
1678  
1679  
1680
